# Supplementary material for: Aging microenvironment: the critical factor to determine the prognosis of glioblastoma from the perspective of response to chemoradiotherapy and immunoregulation
Source: Research Square preprint supplement (doi:10.21203/rs.3.rs-5289523/v1), 2024-11-18
Supplement: Supplementary file 1 [file d4163a282f7e4d9f92a142af.docx]

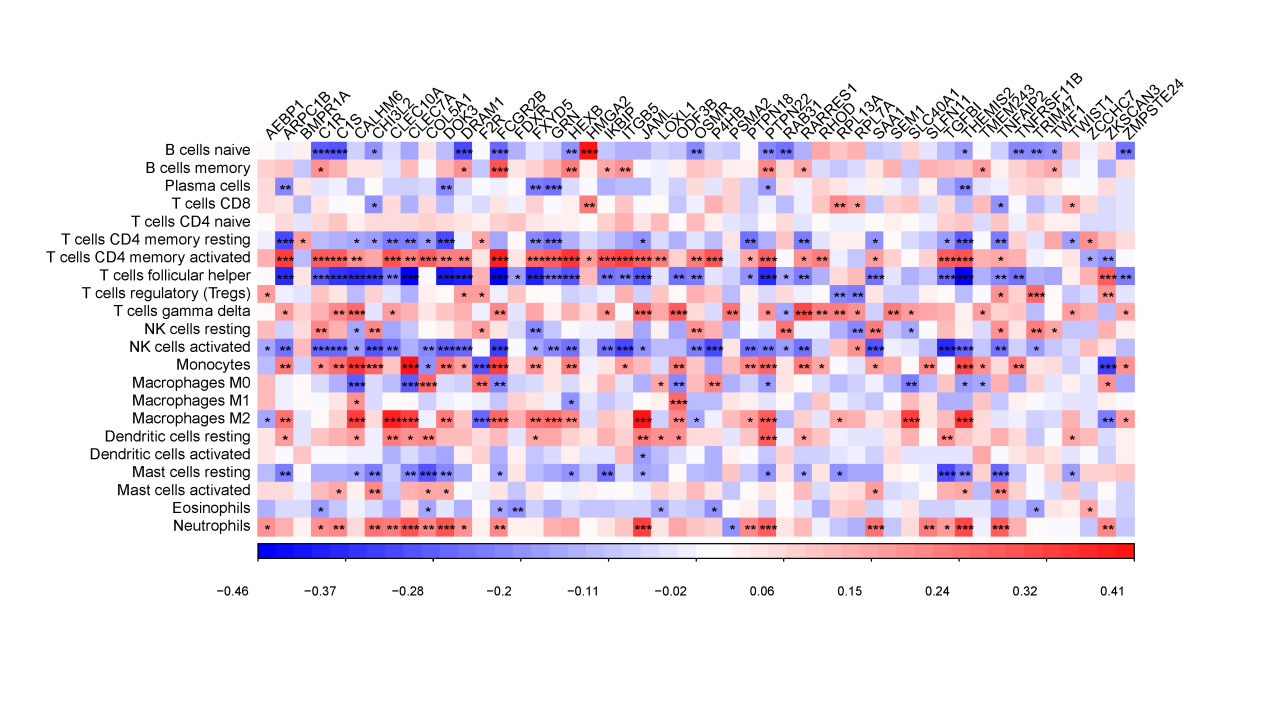


Supplementary Figure 1：The results of CIBERSORT showed the correlation between the enrichment score of 28 immune infiltrating cells and the expression of hub genes significantly related to survival.


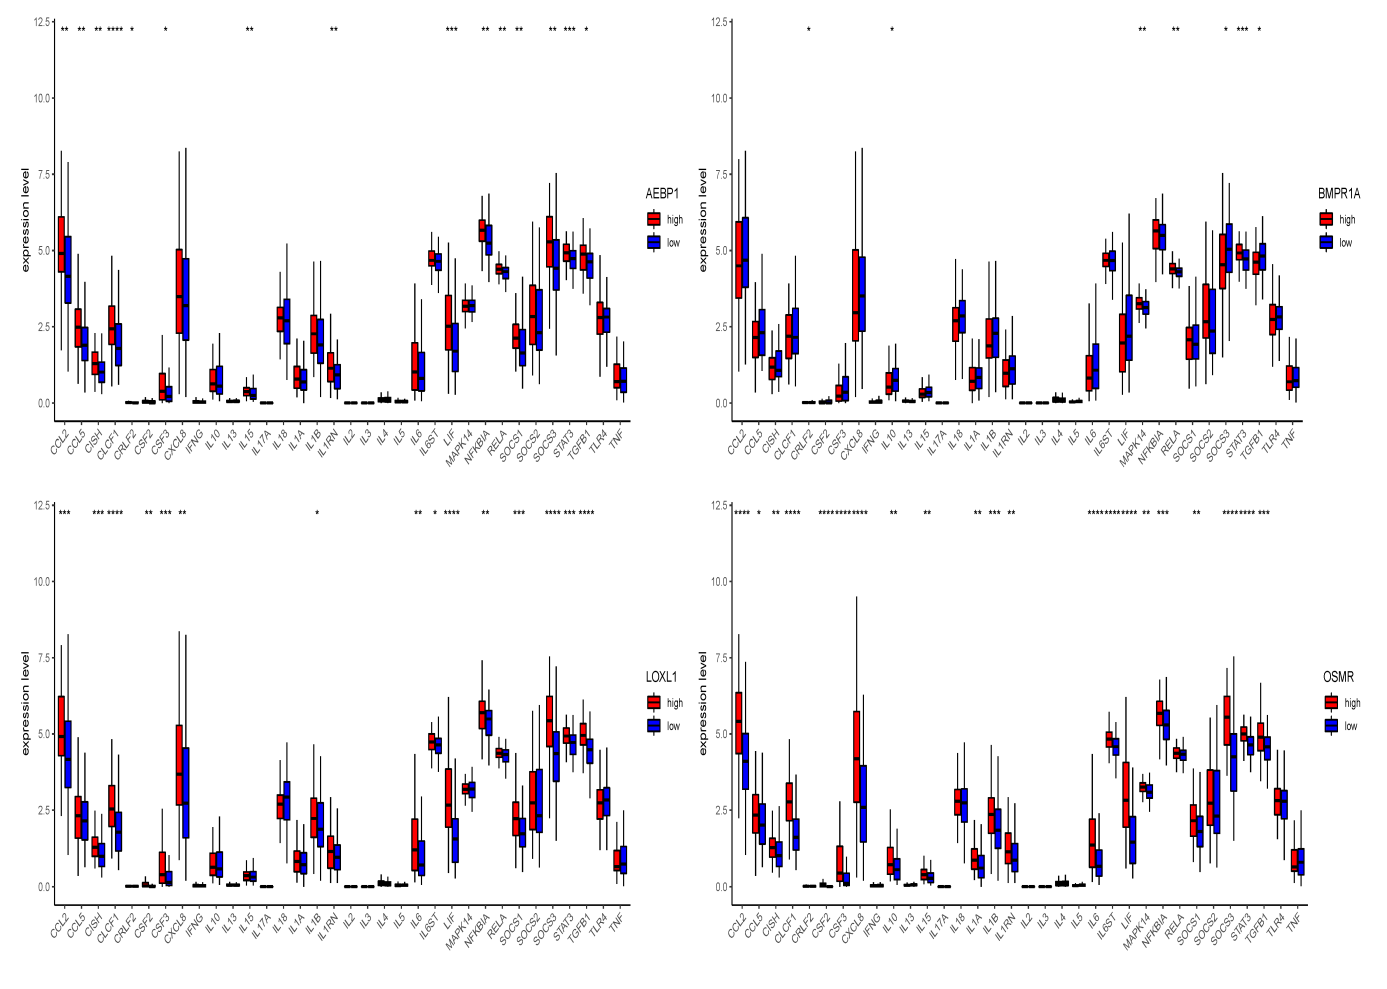


Supplementary Figure 2 : The differential expression of inflammatory genes in the high and low expression groups.

Supplementary Table 1

|  | TCGA-GBM | TCGA-Normal |
| --- | --- | --- |
| Total | 167 | 5 |
| Age |  |  |
| >60 | 81 | \ |
| <=60 | 86 | \ |
| Gender |  |  |
| Male | 108 | \ |
| Female | 59 | \ |
| radiation_therapy |  |  |
| YES | 137 | \ |
| NO | 21 | \ |
| NA | 9 | \ |
| IDH1_mut |  |  |
| Mutant | 7 | \ |
| Wildtype | 141 | \ |
| NA | 19 | \ |
| TP53_mut |  |  |
| Mutant | 47 | \ |
| Wildtype | 101 | \ |
| NA | 19 | \ |
| race |  |  |
| asian | 5 | \ |
| black or african american | 11 | \ |
| white | 149 | \ |
| NA | 2 | \ |
| event |  |  |
| Dead | 133 | \ |
| Alive | 33 | \ |

Supplementary Table 2

|  | CGGA325-GBM |
| --- | --- |
| Total | 85 |
| Age |  |
| >60 | 12 |
| <=60 | 73 |
| Gender |  |
| Male | 53 |
| Female | 32 |
| radiation_therapy |  |
| YES | 71 |
| NO | 11 |
| NA | 3 |
| event |  |
| Dead | 73 |
| Alive | 12 |

Supplementary Table 3

| name | number |
| --- | --- |
| DEMAGALHAES_AGING_DN | 16 |
| DEMAGALHAES_AGING_UP | 54 |
| FOURATI_BLOOD_TWINRIX_AGE_25_83YO_RESPONDERS_VS_POOR_RESPONDERS_0DY_DN | 747 |
| FOURATI_BLOOD_TWINRIX_AGE_25_83YO_RESPONDERS_VS_POOR_RESPONDERS_0DY_UP | 585 |
| FOURATI_BLOOD_TWINRIX_AGE_65_81Y0_RESPONDERS_VS_POOR_RESPONDERS_TRAINING_SET_0DY_NETWORK_INFERENCE_UP | 7 |
| FOURATI_BLOOD_TWINRIX_AGE_65_81YO_RESPONDERS_VS_POOR_RESPONDERS_TRAINING_SET_0DY_NETWORK_INFERENCE_DN | 5 |
| FOURATI_BLOOD_TWINRIX_AGE_65_83YO_POOR_RESPONDERS_VS_RESPONDERS_0DY_NETWORK_INFERENCE_UP | 5 |
| GOBP_AGING | 304 |
| GOBP_CELL_AGING | 115 |
| GOBP_CELLULAR_SENESCENCE | 79 |
| GOBP_MULTICELLULAR_ORGANISM_AGING | 31 |
| GOBP_MUSCLE_ATROPHY | 13 |
| GOBP_NEGATIVE_REGULATION_OF_CELL_AGING | 28 |
| GOBP_POSITIVE_REGULATION_OF_CELL_AGING | 23 |
| GOBP_REGULATION_OF_CELL_AGING | 60 |
| GOBP_REPLICATIVE_SENESCENCE | 17 |
| GOBP_STRIATED_MUSCLE_ATROPHY | 9 |
| HP_MACULAR_DYSTROPHY | 19 |
| KIM_HYPOXIA | 17 |
| KYNG_DNA_DAMAGE_BY_4NQO | 36 |
| KYNG_DNA_DAMAGE_BY_4NQO_OR_GAMMA_RADIATIDIATION | 15 |
| KYNG_DNA_DAMAGE_BY_4NQO_OR_UV | 60 |
| KYNG_DNA_DAMAGE_BY_GAMMA_AND_UV_RADIATIOIATION | 77 |
| KYNG_DNA_DAMAGE_BY_GAMMA_RADIATION | 77 |
| KYNG_DNA_DAMAGE_BY_UV | 54 |
| KYNG_DNA_DAMAGE_DN | 182 |
| KYNG_DNA_DAMAGE_UP | 205 |
| KYNG_ENVIRONMENTAL_STRESS_RESPONSE_DN | 17 |
| KYNG_ENVIRONMENTAL_STRESS_RESPONSE_NOT_BNOT_BY_4NQO_IN_OLD | 12 |
| KYNG_ENVIRONMENTAL_STRESS_RESPONSE_NOT_BNOT_BY_4NQO_IN_WS | 37 |
| KYNG_ENVIRONMENTAL_STRESS_RESPONSE_NOT_BNOT_BY_GAMMA_IN_OLD | 29 |
| KYNG_ENVIRONMENTAL_STRESS_RESPONSE_NOT_BNOT_BY_GAMMA_IN_WS | 31 |
| KYNG_ENVIRONMENTAL_STRESS_RESPONSE_NOT_BNOT_BY_UV_IN_OLD | 23 |
| KYNG_ENVIRONMENTAL_STRESS_RESPONSE_NOT_BNOT_BY_UV_IN_WS | 12 |
| KYNG_ENVIRONMENTAL_STRESS_RESPONSE_UP | 53 |
| KYNG_NORMAL_AGING_DN | 18 |
| KYNG_NORMAL_AGING_UP | 15 |
| KYNG_WERNER_SYNDROM_AND_NORMAL_AGING_DN | 186 |
| KYNG_WERNER_SYNDROM_AND_NORMAL_AGING_UP | 77 |
| KYNG_WERNER_SYNDROM_DN | 19 |
| KYNG_WERNER_SYNDROM_UP | 14 |
| LY_AGING_MIDDLE_DN | 16 |
| LY_AGING_MIDDLE_UP | 14 |
| LY_AGING_OLD_DN | 56 |
| LY_AGING_OLD_UP | 7 |
| LY_AGING_PREMATURE_DN | 30 |
| RODWELL_AGING_KIDNEY_DN | 149 |
| RODWELL_AGING_KIDNEY_NO_BLOOD_DN | 149 |
| RODWELL_AGING_KIDNEY_NO_BLOOD_UP | 223 |
| RODWELL_AGING_KIDNEY_UP | 500 |
| WEIGEL_OXIDATIVE_STRESS_BY_HNE_AND_H2O2 | 36 |
| WEIGEL_OXIDATIVE_STRESS_BY_HNE_AND_TBH | 59 |
| WEIGEL_OXIDATIVE_STRESS_BY_TBH_AND_H2O2 | 35 |
| WEIGEL_OXIDATIVE_STRESS_RESPONSE | 33 |
| WP_CALORIC_RESTRICTION_AND_AGING | 8 |
| WP_NAD_METABOLISM_SIRTUINS_AND_AGING | 11 |
| WP_SOMATROPH_AXIS_GH_AND_ITS_RELATIONSHIONSHIP_TO_DIETARY_RESTRICTION_AND_AGING | 6 |

Supplementary Table 4

| TCGA-GBM data download: |
| --- |
| Expression data: https://gdc-hub.s3.us-east-1.amazonaws.com/download/ TCGA-GBM.htseq_fpkm.tsv.gz； |
| Phenotype data: https://gdc-hub.s3.us-east-1.amazonaws.com/download/TCGA-GBM.GDC_phenotype.tsv.gz； |
| Survival data: https://gdc-hub.s3.us-east-1.amazonaws.com/download/TCGA-GBM.survival.tsv； |
| Gene copy data: https://tcga-xena-hub.s3.us-east-1.amazonaws.com/download/TCGA.GBM.sampleMap%2FGistic2_CopyNumber_Gistic2_all_thresholded.by_genes.gz； |
| Genetic mutation data:https://portal.gdc.cancer.gov/files/da904cd3-79d7-4ae3-b6c0-e7127998b3e6 |
| CGGA-GBM data download: http://www.cgga.org.cn/download.jsp |
| The human GTF file was downloaded from the Ensembl database (Homo_sapiens.GRCh38.99.gtf.gz) :http://www.ensembl.org/info/data/ftp/index.html |
| The protein interaction network was obtained from the STRING (V 11.5, https://string-db.org/) database . |
| The immune cell-related genes was downloaded from Table S6.List of Pan-cancer Immune Metagenes of PMID: 28052254 |
| The relationship between immune infiltrating cells and gene expression was downloaded from TIMER database:https://cistrome.shinyapps.io/timer/ |
| The proinflammatory factor was downloaded from GeneCards database (https://www.genecards.org/), the data were filtered by Score > 20.MSigDB, https://www.gsea-msigdb.org/gsea/msigdb/index.jsp v 7.4 |

Supplementary Table 5: The 50 gene sets concentrated in tumor samples of GBM.

| GS follow link to MSigDB | SIZE | ES | NES | NOM p-val | FDR q-val | FWER p-val |
| --- | --- | --- | --- | --- | --- | --- |
| LY_AGING_OLD_DN | 56 | 0.74 | 1.85 | 0.002 | 0.07 | 0.049 |
| KYNG_DNA_DAMAGE_DN | 180 | 0.46 | 1.84 | 0.004 | 0.038 | 0.053 |
| WEIGEL_OXIDATIVE_STRESS_BY_TBH_AND_H2O2 | 35 | 0.56 | 1.82 | 0.01 | 0.034 | 0.066 |
| KYNG_ENVIRONMENTAL_STRESS_RESPONSE_UP | 53 | 0.52 | 1.72 | 0.012 | 0.066 | 0.137 |
| LY_AGING_PREMATURE_DN | 30 | 0.68 | 1.7 | 0.019 | 0.064 | 0.159 |
| WEIGEL_OXIDATIVE_STRESS_BY_HNE_AND_H2O2 | 36 | 0.47 | 1.67 | 0.017 | 0.074 | 0.199 |
| KYNG_ENVIRONMENTAL_STRESS_RESPONSE_NOT_BY_GAMMA_IN_WS | 31 | 0.52 | 1.67 | 0.018 | 0.064 | 0.201 |
| DEMAGALHAES_AGING_UP | 54 | 0.63 | 1.65 | 0.046 | 0.067 | 0.228 |
| RODWELL_AGING_KIDNEY_UP | 465 | 0.54 | 1.64 | 0.041 | 0.063 | 0.237 |
| LY_AGING_MIDDLE_DN | 16 | 0.91 | 1.62 | 0.002 | 0.076 | 0.302 |
| GOBP_REPLICATIVE_SENESCENCE | 16 | 0.65 | 1.61 | 0.019 | 0.074 | 0.313 |
| RODWELL_AGING_KIDNEY_NO_BLOOD_UP | 213 | 0.48 | 1.53 | 0.061 | 0.123 | 0.455 |
| KYNG_ENVIRONMENTAL_STRESS_RESPONSE_NOT_BY_4NQO_IN_WS | 37 | 0.45 | 1.52 | 0.051 | 0.117 | 0.461 |
| GOBP_CELL_AGING | 102 | 0.41 | 1.5 | 0.04 | 0.134 | 0.52 |
| KYNG_DNA_DAMAGE_BY_GAMMA_AND_UV_RADIATION | 77 | 0.39 | 1.5 | 0.009 | 0.125 | 0.522 |
| GOBP_CELLULAR_SENESCENCE | 67 | 0.42 | 1.49 | 0.032 | 0.125 | 0.549 |
| KYNG_DNA_DAMAGE_BY_4NQO_OR_GAMMA_RADIATION | 15 | 0.51 | 1.45 | 0.066 | 0.157 | 0.626 |
| KYNG_DNA_DAMAGE_BY_UV | 53 | 0.44 | 1.44 | 0.076 | 0.159 | 0.654 |
| WEIGEL_OXIDATIVE_STRESS_RESPONSE | 33 | 0.44 | 1.39 | 0.113 | 0.208 | 0.732 |
| WP_CALORIC_RESTRICTION_AND_AGING | 8 | 0.58 | 1.38 | 0.1 | 0.216 | 0.757 |
| GOBP_REGULATION_OF_CELL_AGING | 48 | 0.4 | 1.36 | 0.098 | 0.232 | 0.796 |
| FOURATI_BLOOD_TWINRIX_AGE_25_83YO_RESPONDERS_VS_POOR_RESPONDERS_0DY_DN | 683 | 0.34 | 1.33 | 0.079 | 0.265 | 0.847 |
| GOBP_AGING | 288 | 0.32 | 1.32 | 0.092 | 0.265 | 0.854 |
| LY_AGING_OLD_UP | 7 | 0.66 | 1.32 | 0.143 | 0.254 | 0.858 |
| GOBP_NEGATIVE_REGULATION_OF_CELL_AGING | 24 | 0.46 | 1.29 | 0.174 | 0.276 | 0.881 |
| FOURATI_BLOOD_TWINRIX_AGE_65_81YO_RESPONDERS_VS_POOR_RESPONDERS_TRAINING_SET_0DY_NETWORK_INFERENCE_DN | 5 | 0.66 | 1.24 | 0.178 | 0.332 | 0.916 |
| WP_NAD_METABOLISM_SIRTUINS_AND_AGING | 11 | 0.49 | 1.23 | 0.231 | 0.339 | 0.925 |
| FOURATI_BLOOD_TWINRIX_AGE_65_83YO_POOR_RESPONDERS_VS_RESPONDERS_0DY_NETWORK_INFERENCE_UP | 4 | 0.78 | 1.22 | 0.252 | 0.339 | 0.933 |
| KYNG_NORMAL_AGING_DN | 18 | 0.42 | 1.21 | 0.228 | 0.34 | 0.94 |
| KYNG_ENVIRONMENTAL_STRESS_RESPONSE_NOT_BY_UV_IN_WS | 12 | 0.49 | 1.21 | 0.239 | 0.329 | 0.94 |
| GOBP_POSITIVE_REGULATION_OF_CELL_AGING | 15 | 0.47 | 1.21 | 0.225 | 0.321 | 0.943 |
| KYNG_WERNER_SYNDROM_AND_NORMAL_AGING_DN | 182 | 0.25 | 1.21 | 0.169 | 0.312 | 0.944 |
| KYNG_WERNER_SYNDROM_DN | 19 | 0.4 | 1.21 | 0.209 | 0.303 | 0.944 |
| GOBP_MULTICELLULAR_ORGANISM_AGING | 30 | 0.4 | 1.21 | 0.216 | 0.298 | 0.946 |
| KYNG_ENVIRONMENTAL_STRESS_RESPONSE_NOT_BY_GAMMA_IN_OLD | 29 | 0.37 | 1.21 | 0.224 | 0.289 | 0.947 |
| KYNG_WERNER_SYNDROM_AND_NORMAL_AGING_UP | 76 | 0.31 | 1.2 | 0.197 | 0.292 | 0.954 |
| KYNG_ENVIRONMENTAL_STRESS_RESPONSE_NOT_BY_4NQO_IN_OLD | 12 | 0.44 | 1.13 | 0.31 | 0.374 | 0.98 |
| KYNG_DNA_DAMAGE_BY_GAMMA_RADIATION | 76 | 0.31 | 1.11 | 0.326 | 0.387 | 0.982 |
| KYNG_DNA_DAMAGE_BY_4NQO | 35 | 0.33 | 1.11 | 0.309 | 0.379 | 0.982 |
| KYNG_DNA_DAMAGE_BY_4NQO_OR_UV | 59 | 0.28 | 1.1 | 0.315 | 0.389 | 0.984 |
| KYNG_ENVIRONMENTAL_STRESS_RESPONSE_DN | 17 | 0.38 | 1.07 | 0.372 | 0.411 | 0.989 |
| KYNG_DNA_DAMAGE_UP | 203 | 0.27 | 1.07 | 0.346 | 0.408 | 0.989 |
| WEIGEL_OXIDATIVE_STRESS_BY_HNE_AND_TBH | 59 | 0.28 | 1.04 | 0.394 | 0.44 | 0.994 |
| KYNG_ENVIRONMENTAL_STRESS_RESPONSE_NOT_BY_UV_IN_OLD | 23 | 0.33 | 1.04 | 0.422 | 0.431 | 0.994 |
| LY_AGING_MIDDLE_UP | 14 | 0.5 | 1.01 | 0.48 | 0.453 | 0.995 |
| GOBP_STRIATED_MUSCLE_ATROPHY | 9 | 0.45 | 1.01 | 0.471 | 0.452 | 0.995 |
| KIM_HYPOXIA | 16 | 0.34 | 0.81 | 0.669 | 0.735 | 1 |
| GOBP_MUSCLE_ATROPHY | 13 | 0.32 | 0.8 | 0.732 | 0.738 | 1 |
| DEMAGALHAES_AGING_DN | 16 | 0.28 | 0.76 | 0.805 | 0.773 | 1 |
| FOURATI_BLOOD_TWINRIX_AGE_65_81Y0_RESPONDERS_VS_POOR_RESPONDERS_TRAINING_SET_0DY_NETWORK_INFERENCE_UP | 6 | 0.33 | 0.67 | 0.878 | 0.874 | 1 |

Supplementary Table 6

|  | p_tumor | p_age | p_gender | p_rt | p_race | p_idh | p_tp53 |
| --- | --- | --- | --- | --- | --- | --- | --- |
| A2M | 0.000185738 | 0.94256307 | 0.723920301 | 0.80580135 | 0.663873237 | 0.840031969 | 0.591141665 |
| ABRACL | 0.009432215 | 0.240557311 | 0.088034952 | 0.242899918 | 0.069526876 | 0.464684528 | 0.144179988 |
| ACE | 0.001160682 | 0.159322661 | 0.536757294 | 0.498991858 | 0.373984322 | 0.910712144 | 0.184974063 |
| ADAM8 | 0.002438211 | 0.128654501 | 0.18880304 | 0.333034822 | 0.541598469 | 0.631255413 | 0.702497751 |
| ADGRE2 | 0.00741679 | 0.150953179 | 0.723920301 | 0.68575557 | 0.723983192 | 0.207504455 | 0.693428915 |
| ADGRE5 | 0.00612611 | 0.046223114 | 0.438289686 | 0.359246837 | 0.85066225 | 0.001426322 | 0.001430767 |
| ADSL | 0.00027477 | 0.446946726 | 0.556806777 | 0.277558466 | 0.31300558 | 0.882322857 | 0.891150361 |
| AEBP1 | 0.000737556 | 0.052511894 | 0.650068369 | 0.39520398 | 0.15710747 | 5.95E-05 | 0.038924313 |
| AHCY | 0.000149421 | 0.41693519 | 0.73903185 | 0.081611728 | 0.935838825 | 0.182785583 | 0.255252974 |
| ALOX5 | 0.001913147 | 0.431789874 | 0.602625129 | 0.277558466 | 0.759299128 | 0.283692402 | 0.424508058 |
| ANTXR1 | 0.000185738 | 0.632134802 | 0.384939408 | 0.031464079 | 0.124310041 | 0.020391678 | 0.455957893 |
| ANTXR2 | 0.00014406 | 0.012444141 | 0.593326622 | 0.244972632 | 0.179299046 | 0.252693596 | 0.470903975 |
| ANXA1 | 0.000166651 | 0.136907219 | 0.374046135 | 0.184659334 | 0.152232701 | 0.000491546 | 0.311994117 |
| ANXA2 | 0.000154968 | 0.062144488 | 0.307967697 | 0.386718754 | 0.132777359 | 2.34E-05 | 0.029002526 |
| ANXA5 | 0.000149421 | 0.018039723 | 0.839479036 | 0.877882692 | 0.826848157 | 0.000338366 | 0.042956185 |
| APBA3 | 0.000957464 | 0.252302203 | 0.849961531 | 0.303253869 | 0.533191016 | 0.723066537 | 0.827001017 |
| APBB1IP | 0.009941546 | 0.576312905 | 0.420694207 | 0.291384339 | 0.389755343 | 0.599710603 | 0.221152781 |
| APRT | 0.000265264 | 0.375941081 | 0.905388283 | 0.693301867 | 0.466483414 | 0.492524709 | 0.991851672 |
| ARHGAP25 | 0.001054553 | 0.813929779 | 0.16828292 | 0.829677379 | 0.093146024 | 0.509648497 | 0.019995703 |
| ARHGAP30 | 0.005332026 | 0.298756447 | 0.32412589 | 0.308090437 | 0.561971242 | 0.903602679 | 0.939758673 |
| ARHGDIB | 0.000149421 | 0.576312905 | 0.187678996 | 0.857731355 | 0.833927353 | 0.656987861 | 0.135415993 |
| ARHGEF6 | 0.000247168 | 0.899347488 | 0.797850875 | 0.030664672 | 0.188537172 | 0.126117244 | 0.995110949 |
| ARNTL | 0.089330794 | 0.282675836 | 0.600294356 | 0.754714172 | 0.996583092 | 0.000429588 | 0.001623753 |
| ARPC1B | 0.000154968 | 0.694861904 | 0.723920301 | 0.528707215 | 0.434842258 | 0.08744751 | 0.501590978 |
| B2M | 0.00014406 | 0.818903828 | 0.579503472 | 0.45150775 | 0.861813089 | 0.38174013 | 0.111582155 |
| BAK1 | 0.000206865 | 0.718664665 | 0.309559107 | 0.542197368 | 0.637185577 | 0.618552379 | 0.577112413 |
| BARD1 | 0.000149421 | 0.94256307 | 0.934624138 | 0.242899918 | 0.176796511 | 0.283692402 | 0.042122704 |
| BCL2A1 | 0.002161103 | 0.464354374 | 0.20867738 | 0.293732906 | 0.972379293 | 0.25643394 | 0.827001017 |
| BCL2L12 | 0.00014406 | 0.020867959 | 0.403520487 | 0.922476966 | 0.807641453 | 0.001715945 | 0.807959156 |
| BCL6 | 0.005959255 | 0.618528252 | 0.438289686 | 0.789982528 | 0.64620269 | 0.003208236 | 0.546812792 |
| BLOC1S4 | 0.000149421 | 0.901882601 | 0.86310183 | 0.19328045 | 0.839375809 | 0.637648327 | 0.910555006 |
| BMP4 | 0.021620784 | 0.666692534 | 0.913350678 | 0.681994086 | 0.701231476 | 0.040371735 | 0.002200581 |
| BMPR1A | 0.000284596 | 0.238000505 | 0.5456232 | 0.067477461 | 0.266109407 | 0.000387992 | 0.228959545 |
| BRCA2 | 0.00016071 | 0.801527854 | 0.22232027 | 0.002922611 | 0.682213993 | 0.599710603 | 0.008991397 |
| BTG3 | 0.00014406 | 0.529200975 | 0.635674058 | 0.21898535 | 0.532020997 | 0.06394571 | 0.25016946 |
| BTN3A3 | 0.00016071 | 0.271356066 | 0.855212864 | 0.873845656 | 0.214424346 | 0.716354908 | 0.820641828 |
| C15orf39 | 0.000389078 | 0.087570092 | 0.774677202 | 0.128216455 | 0.813287662 | 0.03238408 | 0.000238324 |
| C15orf48 | 0.00049406 | 0.598362487 | 0.330741041 | 0.240839564 | 0.465707464 | 0.111296511 | 0.754656521 |
| C1QA | 0.00027477 | 0.353912037 | 0.462395888 | 0.442327304 | 0.615271918 | 0.521235121 | 0.372081838 |
| C1QB | 0.000284596 | 0.30024802 | 0.315978986 | 0.697086512 | 0.749732019 | 0.64406831 | 0.289114091 |
| C1QC | 0.000294749 | 0.318533692 | 0.309559107 | 0.801838912 | 0.861113513 | 0.833024756 | 0.336036454 |
| C1QTNF6 | 0.000316083 | 0.514632541 | 0.347658175 | 0.93876124 | 0.675936948 | 0.334842013 | 0.714655516 |
| C1R | 0.000192544 | 0.318533692 | 0.332408383 | 0.505517686 | 0.10564883 | 0.001715945 | 0.009888596 |
| C1S | 0.000762216 | 0.75001786 | 0.939950407 | 0.601375835 | 0.118850944 | 0.002537633 | 0.050619655 |
| C3 | 0.001691566 | 0.709109231 | 0.958611951 | 0.473342507 | 0.330506075 | 0.300119756 | 0.016034504 |
| CALHM2 | 0.00229583 | 0.278393974 | 0.779810386 | 0.479686045 | 0.35068603 | 0.004916118 | 0.448586089 |
| CALHM6 | 0.000690443 | 0.323216744 | 0.741560453 | 0.576656221 | 0.675783386 | 0.168486525 | 0.140843875 |
| CALR | 0.000154968 | 0.757314447 | 0.143893478 | 0.217071611 | 0.10085934 | 0.132921487 | 0.067541449 |
| CALU | 0.00014406 | 0.190844131 | 0.614339609 | 0.134767329 | 0.116418073 | 0.002252839 | 0.463397357 |
| CAPN2 | 0.000256066 | 0.004095064 | 0.916006784 | 0.727628403 | 0.19869166 | 0.085798477 | 0.897611921 |
| CARHSP1 | 0.008946289 | 0.239276499 | 0.87100447 | 0.963233616 | 0.684606006 | 0.02700765 | 0.975558415 |
| CASP1 | 0.00014406 | 0.227965346 | 0.448245021 | 0.222849113 | 0.671438603 | 0.021897089 | 0.052084459 |
| CCL5 | 0.000762216 | 0.250977819 | 0.642854453 | 0.644826238 | 0.324375603 | 0.021897089 | 0.78274778 |
| CCN2 | 0.001021221 | 0.781789614 | 0.022308339 | 0.130806462 | 0.738484733 | 0.343911796 | 0.319879045 |
| CCNA2 | 0.00014406 | 0.221848536 | 0.860470617 | 0.022961378 | 0.674579508 | 0.304323762 | 0.001259126 |
| CCNB1 | 0.000179158 | 0.454637235 | 0.480950563 | 0.133436868 | 0.586247565 | 0.946355458 | 0.010245085 |
| CCND1 | 0.013891272 | 0.650471759 | 0.255672457 | 0.492511067 | 0.458335467 | 0.048931951 | 0.739186743 |
| CCR1 | 0.001855382 | 0.92474059 | 0.319221474 | 0.275298326 | 0.703488591 | 0.896500935 | 0.549534443 |
| CD14 | 0.000762216 | 0.813929779 | 0.472654374 | 0.325418236 | 0.780243335 | 0.191786155 | 0.236960509 |
| CD1D | 0.000230235 | 0.404187999 | 0.446243741 | 0.580158112 | 0.924128549 | 0.847051883 | 0.473421012 |
| CD36 | 0.001541151 | 0.494187943 | 0.070871709 | 0.325418236 | 0.853022668 | 0.75693566 | 0.415092429 |
| CD53 | 0.000604493 | 0.848894578 | 0.17563895 | 0.45768745 | 0.830678254 | 0.791278198 | 0.20175268 |
| CD69 | 0.023220833 | 0.186536475 | 0.319221474 | 0.253387468 | 0.604033946 | 0.343911796 | 0.140843875 |
| CDC20 | 0.000247168 | 0.529200975 | 0.741560453 | 0.173072543 | 0.736010031 | 0.960646954 | 0.000569522 |
| CDC25A | 0.000230235 | 0.212307743 | 0.568100902 | 0.189797183 | 0.453156271 | 0.03238408 | 0.000527961 |
| CDC25C | 0.000149421 | 0.190844131 | 0.502033542 | 0.133436868 | 0.54260137 | 0.142431704 | 0.076583407 |
| CDCA7 | 0.00014406 | 0.996167573 | 0.674349407 | 0.340765542 | 0.798866125 | 0.696352924 | 0.001866093 |
| CDH11 | 0.000350809 | 0.851404344 | 0.654895986 | 0.191532991 | 0.228344689 | 0.039504165 | 0.298506313 |
| CDH6 | 0.011922537 | 0.869013481 | 0.684159405 | 0.659593617 | 0.742739906 | 0.00064122 | 0.003607485 |
| CDK4 | 0.00014406 | 0.088165523 | 0.207467881 | 0.837672311 | 0.879451351 | 0.025790647 | 0.038539409 |
| CDK6 | 0.001691566 | 0.94256307 | 0.969286543 | 0.200387422 | 0.266173648 | 0.128354517 | 0.075906389 |
| CDKN1A | 0.003578451 | 0.271356066 | 0.671905453 | 0.576656221 | 0.798528714 | 0.006473768 | 4.44E-06 |
| CDKN2A | 0.041027047 | 0.029805038 | 0.556806777 | 0.479686045 | 0.670998483 | 0.082575815 | 1.62E-05 |
| CEBPB | 0.00058462 | 0.454637235 | 0.701454959 | 0.697086512 | 0.477620878 | 0.109296353 | 0.186331563 |
| CENPA | 0.00014406 | 0.32794445 | 0.713904966 | 0.338175962 | 0.601730662 | 0.562829354 | 0.006556042 |
| CENPF | 0.000238561 | 0.382886021 | 0.713904966 | 0.048622074 | 0.278229116 | 0.194857627 | 0.000209587 |
| CEPT1 | 0.003902589 | 0.504355607 | 0.931962086 | 0.837672311 | 0.511341901 | 0.77748837 | 0.855752132 |
| CGAS | 0.00064614 | 0.395227317 | 0.014320043 | 0.476508493 | 0.75917472 | 0.000429588 | 0.405801351 |
| CHEK1 | 0.00016071 | 0.764632726 | 0.609641772 | 0.093968233 | 0.426852602 | 0.362517004 | 0.000406851 |
| CHEK2 | 0.00014406 | 0.195224568 | 0.713904966 | 0.492511067 | 0.435425341 | 0.287741007 | 0.002589222 |
| CHI3L2 | 0.00027477 | 0.664365491 | 0.561311277 | 0.594264388 | 0.231468121 | 0.004916118 | 9.78E-06 |
| CIB2 | 0.00368367 | 0.909493846 | 0.268490166 | 0.601375835 | 0.882309334 | 0.486886098 | 0.000254042 |
| CKS1B | 0.00016071 | 0.740323869 | 0.81080398 | 0.590723142 | 0.402322801 | 0.538865825 | 0.078644051 |
| CLEC10A | 0.008946289 | 0.052511894 | 0.356319518 | 0.762510381 | 0.645689527 | 0.207504455 | 0.785887343 |
| CLEC4A | 0.000284596 | 0.652779128 | 0.032265301 | 0.217071611 | 0.610842542 | 0.581133076 | 0.451035809 |
| CLEC7A | 0.011619643 | 0.275564044 | 0.131473176 | 0.255522263 | 0.677037768 | 0.182785583 | 0.361239525 |
| CLIC1 | 0.000154968 | 0.120028724 | 0.50630806 | 0.963233616 | 0.25022875 | 5.31E-05 | 0.048720412 |
| CLIC4 | 0.001198196 | 0.552510543 | 0.659738073 | 0.296094136 | 0.067286341 | 0.300119756 | 0.92352187 |
| CMTM3 | 0.00014406 | 0.003892368 | 0.662164489 | 0.505517686 | 0.542963949 | 0.002537633 | 0.792176878 |
| CMTM7 | 0.000214396 | 0.742743572 | 0.650068369 | 0.255522263 | 0.55335639 | 0.80513366 | 0.306165205 |
| COL14A1 | 0.004253179 | 0.367370064 | 0.998664303 | 0.532063669 | 0.006097283 | 0.59348825 | 0.00663745 |
| COL15A1 | 0.010475236 | 0.676032624 | 0.191066008 | 0.076371185 | 0.872670457 | 0.160319778 | 0.34222859 |
| COL1A1 | 0.000316083 | 0.18440978 | 0.955944387 | 0.971399923 | 0.477365604 | 0.024054143 | 0.639972879 |
| COL1A2 | 0.000238561 | 0.072683066 | 0.623782757 | 0.60852544 | 0.52364488 | 0.008025448 | 0.365552455 |
| COL3A1 | 0.000172798 | 0.258997163 | 0.977296205 | 0.535430882 | 0.863298125 | 0.043071964 | 0.949513226 |
| COL5A1 | 0.000988867 | 0.098796148 | 0.468536013 | 0.967316341 | 0.609305574 | 0.013452016 | 0.422142521 |
| COL8A2 | 0.001021221 | 0.764632726 | 0.172457519 | 0.942836582 | 0.69949976 | 0.048931951 | 1 |
| COPB2 | 0.00027477 | 0.558954025 | 0.633288141 | 0.043592621 | 0.141484231 | 0.696352924 | 0.109755752 |
| CORO1C | 0.000172798 | 0.002916389 | 0.239252876 | 0.001604842 | 0.113713017 | 3.21E-05 | 0.058302758 |
| CRIP1 | 0.000185738 | 0.217040427 | 0.066293866 | 0.865781531 | 0.065556245 | 0.010701008 | 0.49640402 |
| CSF2RB | 0.004016423 | 0.231692611 | 0.384939408 | 0.436266805 | 0.881079069 | 0.663486603 | 0.702497751 |
| CTHRC1 | 0.000713638 | 0.922197392 | 0.472654374 | 0.370085085 | 0.764669021 | 0.054313484 | 0.5549977 |
| CTNNA1 | 0.019166858 | 0.028619925 | 0.609641772 | 0.163581075 | 0.317822114 | 0.074947029 | 0.04966242 |
| CTNND1 | 0.00049406 | 0.348946636 | 0.790105397 | 0.026924191 | 0.049023458 | 0.084174664 | 0.817466621 |
| CTSC | 0.000154968 | 0.79411042 | 0.286256843 | 0.95099165 | 0.830848803 | 0.264029539 | 0.871810692 |
| CTSS | 0.000185738 | 0.904418716 | 0.224867901 | 0.528707215 | 0.833437976 | 0.295954647 | 0.18094548 |
| CXCL16 | 0.000284596 | 0.452707648 | 0.189932042 | 0.739197218 | 0.495177233 | 0.119587407 | 0.016580784 |
| CXCR4 | 0.000179158 | 0.268575324 | 0.086180351 | 0.5388088 | 0.015948725 | 0.005197411 | 0.3178957 |
| CXorf38 | 0.002438211 | 0.312359093 | 0.142977494 | 0.549006232 | 0.260593962 | 0.946355458 | 0.068776685 |
| CYBC1 | 0.00078764 | 0.504355607 | 0.32412589 | 0.052863018 | 0.301675619 | 0.77748837 | 0.025854679 |
| DAXX | 0.000214396 | 0.275564044 | 0.792684961 | 0.08526482 | 0.059309637 | 0.031665436 | 0.002520373 |
| DDR2 | 0.004901423 | 0.282675836 | 0.759337471 | 0.013367455 | 0.94242343 | 0.081001673 | 0.356958646 |
| DDX39A | 0.000179158 | 0.889217554 | 0.593326622 | 0.559297991 | 0.395712558 | 0.670010761 | 0.333988533 |
| DDX58 | 0.008040988 | 0.676032624 | 0.32412589 | 0.077225043 | 0.125916558 | 0.191786155 | 0.78274778 |
| DNALI1 | 0.000230235 | 0.294311452 | 0.460359201 | 0.727628403 | 0.906946397 | 0.000755248 | 0.228959545 |
| DOCK11 | 0.000604493 | 0.134389615 | 0.383110514 | 0.051620896 | 0.74857067 | 0.004916118 | 0.001371292 |
| DOCK2 | 0.005482978 | 0.46631158 | 0.216041782 | 0.914346569 | 0.574587284 | 0.868182383 | 0.517322408 |
| DOK1 | 0.000179158 | 0.00691252 | 0.945279363 | 0.113504811 | 0.236340737 | 0.000145097 | 0.009208605 |
| DOK3 | 0.000230235 | 0.301744548 | 0.713904966 | 0.043592621 | 0.686593373 | 0.25643394 | 0.795326753 |
| DPP3 | 0.00258863 | 0.725860317 | 0.550083234 | 0.49574581 | 0.437898854 | 0.59348825 | 0.579905683 |
| DRAM1 | 0.00014406 | 0.420620332 | 0.609641772 | 0.626562765 | 0.636709869 | 0.000491546 | 0.000169726 |
| DTX3L | 0.000222183 | 0.841374562 | 0.756789848 | 0.392363147 | 0.081344719 | 0.224136902 | 0.946260795 |
| ECRG4 | 0.240635393 | 0.409622282 | 0.039970095 | 0.386718754 | 0.411016177 | 0.637648327 | 0.327893177 |
| EFEMP1 | 0.000238561 | 0.488140386 | 0.839479036 | 0.885966197 | 0.158955917 | 0.036190439 | 0.044665015 |
| EFNB1 | 0.000179158 | 0.645867075 | 0.777242578 | 0.163581075 | 0.858325197 | 0.98926332 | 0.028703328 |
| EML3 | 0.005184837 | 0.183353187 | 0.939950407 | 0.144369417 | 0.307935889 | 0.295954647 | 0.473421012 |
| EML4 | 0.000338855 | 0.337533753 | 0.597967667 | 0.460795015 | 0.153328169 | 0.107324725 | 0.045540714 |
| EMP3 | 0.000199584 | 0.074748083 | 0.358067972 | 0.492511067 | 0.262473703 | 1.38E-05 | 0.005370088 |
| ENTPD1 | 0.001088888 | 0.975731612 | 0.159168085 | 0.719950014 | 0.971949214 | 0.59348825 | 0.807959156 |
| EPS8L1 | 0.001359732 | 0.799053352 | 0.003198372 | 0.959151854 | 0.070009887 | 0.550783464 | 0.426881326 |
| ERBB2 | 0.001359732 | 0.014109537 | 0.039326513 | 0.704678377 | 0.735999211 | 0.001110041 | 0.0281129 |
| ERCC1 | 0.000546685 | 0.808963222 | 0.982637301 | 0.918410701 | 0.038834673 | 0.38664191 | 0.07259418 |
| F2R | 0.00014406 | 0.066766628 | 0.691552153 | 0.002922611 | 0.228628656 | 0.396560022 | 0.634140782 |
| FAS | 0.000624994 | 0.249658294 | 0.519245571 | 0.138820269 | 0.324444231 | 0.001182374 | 0.009318955 |
| FBXO5 | 0.000149421 | 0.091191811 | 0.565833333 | 0.043061938 | 0.114026274 | 0.062669451 | 0.00092989 |
| FCER1G | 0.000166651 | 0.623049561 | 0.115966373 | 0.32794441 | 0.811163207 | 0.271778886 | 0.182281038 |
| FCGR2A | 0.00016071 | 0.889217554 | 0.502033542 | 0.946913421 | 0.866773786 | 0.137613264 | 0.121076368 |
| FCGR2B | 0.000238561 | 0.374217073 | 0.073524976 | 0.253387468 | 0.304740191 | 0.002058801 | 0.182281038 |
| FDXR | 0.00629716 | 0.058214 | 0.468536013 | 0.008732348 | 0.987758045 | 0.00891981 | 2.79E-07 |
| FGFR4 | 0.136083549 | 0.352251965 | 0.574929568 | 0.697086512 | 0.573043375 | 0.750121981 | 9.33E-05 |
| FIBIN | 0.00014406 | 0.627585125 | 0.250114425 | 0.934687501 | 0.764973231 | 0.854083954 | 0.63705402 |
| FLT3LG | 0.000363156 | 0.666692534 | 0.568100902 | 0.110043019 | 0.919844998 | 0.049970912 | 0.387595969 |
| FMO1 | 0.000389078 | 0.294311452 | 0.194497792 | 0.163581075 | 0.245721961 | 0.264029539 | 0.002355512 |
| FMO4 | 0.011323596 | 0.236729322 | 0.377655851 | 0.273050779 | 0.18137518 | 0.38664191 | 0.512050367 |
| FN1 | 0.00014406 | 0.035533664 | 0.761887709 | 0.476508493 | 0.783599619 | 0.283692402 | 0.451035809 |
| FOXM1 | 0.00014406 | 0.482132971 | 0.99065033 | 0.073855711 | 0.681863951 | 0.946355458 | 0.090408314 |
| FXYD5 | 0.000192544 | 0.362286376 | 0.963948439 | 0.678240487 | 0.12247929 | 0.149900847 | 0.63705402 |
| FYB1 | 0.002438211 | 0.874057018 | 0.418765087 | 0.786041031 | 0.688071654 | 0.910712144 | 0.5386881 |
| GADD45A | 0.00266698 | 0.863975268 | 0.418765087 | 0.200387422 | 0.475358173 | 0.051028304 | 0.096800345 |
| GALNT2 | 0.000477596 | 0.042829192 | 0.169319389 | 1 | 0.558331112 | 0.067903827 | 0.147576345 |
| GBP1 | 0.000179158 | 0.178137434 | 0.448245021 | 0.300854613 | 0.166253617 | 0.010979752 | 0.34222859 |
| GBP2 | 0.000185738 | 0.891748408 | 0.061032413 | 0.240839564 | 0.023369085 | 0.357807614 | 0.448586089 |
| GBP5 | 0.000238561 | 0.055710173 | 0.283241839 | 0.5388088 | 0.824117525 | 0.126117244 | 0.660559038 |
| GGT5 | 0.001124255 | 0.163153213 | 0.772114283 | 0.845684039 | 0.408478261 | 0.008025448 | 0.058302758 |
| GIMAP2 | 0.000192544 | 0.627585125 | 0.405407684 | 0.49574581 | 0.883226644 | 0.042155407 | 0.009208605 |
| GLIPR2 | 0.001359732 | 0.680721546 | 0.126411638 | 0.226761424 | 0.025137129 | 0.960646954 | 0.204653735 |
| GLRX | 0.002747491 | 0.713881339 | 0.829024937 | 0.244972632 | 0.730191257 | 0.065243358 | 0.005936427 |
| GMFG | 0.000327284 | 0.894280365 | 0.420694207 | 0.470188126 | 0.510701931 | 0.099718476 | 0.099288588 |
| GNB2 | 0.00014406 | 0.271356066 | 0.635674058 | 0.439291053 | 0.117030708 | 0.013118207 | 0.475945432 |
| GNB4 | 0.000166651 | 0.701972474 | 0.080225191 | 0.242899918 | 0.599437956 | 0.509648497 | 0.095982101 |
| GNS | 0.000149421 | 0.826378525 | 0.074608782 | 0.697086512 | 0.386469401 | 0.029590997 | 0.717706451 |
| GPNMB | 0.001855382 | 0.643569799 | 0.091197356 | 0.111187559 | 0.755202231 | 0.113325448 | 0.042537718 |
| GPX8 | 0.000149421 | 0.025726823 | 0.420694207 | 0.659593617 | 0.136157834 | 0.000150439 | 0.344308749 |
| GRN | 0.000166651 | 0.735492184 | 0.829024937 | 0.644826238 | 0.931476991 | 0.24170129 | 0.991851672 |
| GTF2B | 0.000238561 | 0.352251965 | 0.926640293 | 0.674494855 | 0.65988014 | 0.140006536 | 0.517322408 |
| GZMA | 0.001493816 | 0.223062396 | 0.86310183 | 0.473342507 | 0.278426823 | 0.069267155 | 0.988592531 |
| GZMK | 0.002830216 | 0.133558416 | 0.691552153 | 0.667027818 | 0.220858009 | 0.084174664 | 0.69947002 |
| H1-2 | 0.000840865 | 0.957862746 | 0.172457519 | 0.100156382 | 0.240343896 | 0.868182383 | 0.327893177 |
| H2AX | 0.000762216 | 0.645867075 | 0.733983125 | 0.467045391 | 0.056423483 | 0.245327368 | 0.748456397 |
| HAS2 | 0.000149421 | 0.83386899 | 0.480950563 | 0.910284675 | 0.727376077 | 0.227574703 | 0.389844027 |
| HCLS1 | 0.000957464 | 0.978285511 | 0.947944775 | 0.762510381 | 0.681433208 | 0.812084703 | 0.272714666 |
| HCST | 0.001855382 | 0.754879811 | 0.586396162 | 0.10121864 | 0.334755563 | 0.348504958 | 0.13648844 |
| HDAC1 | 0.000154968 | 0.420620332 | 0.36511564 | 0.370085085 | 0.45381464 | 0.575000956 | 0.006395913 |
| HEXB | 0.000166651 | 0.991057823 | 0.347658175 | 0.942836582 | 0.188437049 | 0.002613799 | 0.535993384 |
| HGFAC | 0.18138649 | 0.899347488 | 0.097795916 | 0.910284675 | 0.508125875 | 0.812084703 | 0.279923037 |
| HLA-A | 0.000192544 | 0.75001786 | 0.538966961 | 0.719950014 | 0.760864999 | 0.056600203 | 0.25868162 |
| HLA-B | 0.000185738 | 0.813929779 | 0.902736224 | 0.837672311 | 0.755407925 | 0.090822266 | 0.30423838 |
| HLA-C | 0.000214396 | 0.960414355 | 0.982637301 | 0.890012457 | 0.645824167 | 0.182785583 | 0.44614394 |
| HLA-DMA | 0.000172798 | 0.796580866 | 0.31115594 | 0.421326693 | 0.824523403 | 0.448409914 | 0.154552059 |
| HLA-DPA1 | 0.000199584 | 0.993612665 | 0.36511564 | 0.604945902 | 0.936415563 | 0.650514958 | 0.138652984 |
| HLA-DQA1 | 0.000256066 | 0.784249507 | 0.375848317 | 0.991826942 | 0.808505554 | 0.840031969 | 0.455957893 |
| HLA-DQB1 | 0.00049406 | 0.96296637 | 0.754244865 | 0.566210789 | 0.67083227 | 0.515424907 | 0.530624392 |
| HLA-DRA | 0.000179158 | 0.774423114 | 0.401638561 | 0.849695949 | 0.771804152 | 0.308566689 | 0.107060544 |
| HLA-DRB1 | 0.000230235 | 0.569773577 | 0.446243741 | 0.770330761 | 0.916962243 | 0.481282548 | 0.215046165 |
| HLA-F | 0.000762216 | 0.901882601 | 0.570372809 | 0.739197218 | 0.259766842 | 0.376876664 | 0.745362395 |
| HMGA1 | 0.012549401 | 0.16902867 | 0.472654374 | 0.689524858 | 0.372273983 | 0.217373026 | 0.394363864 |
| HMGA2 | 0.002512391 | 0.63669845 | 0.403520487 | 0.731477932 | 0.558640167 | 0.07206127 | 0.92352187 |
| HMGB2 | 0.00014406 | 0.344025711 | 0.470592706 | 0.392363147 | 0.231603328 | 0.38174013 | 8.72E-05 |
| HSD17B10 | 0.000149421 | 0.673692852 | 0.797850875 | 0.343367789 | 0.33122777 | 0.275711396 | 0.881471692 |
| ID1 | 0.004901423 | 0.96296637 | 0.803025656 | 0.821700045 | 0.389951988 | 0.035400041 | 0.383123624 |
| IFNAR2 | 0.00014406 | 0.742743572 | 0.14948414 | 0.58366994 | 0.229923403 | 0.18575031 | 0.422142521 |
| IFNGR1 | 0.001021221 | 0.496212665 | 0.213566471 | 0.498991858 | 0.999753466 | 0.275711396 | 0.408112399 |
| IFNGR2 | 0.000238561 | 0.79411042 | 0.950610769 | 0.80580135 | 0.939728309 | 0.00293982 | 0.02276187 |
| IGFBP1 | 0.001403141 | 0.122335007 | 0.254274968 | 0.120685276 | 0.395213184 | 0.784374822 | 0.038157745 |
| IGFBP3 | 0.000294749 | 0.725860317 | 0.422628535 | 0.036645471 | 0.275204021 | 0.008025448 | 0.13648844 |
| IKBIP | 0.00014406 | 0.298756447 | 0.250114425 | 0.257669527 | 0.7568693 | 0.047911184 | 0.475945432 |
| IKBKB | 0.000154968 | 0.005525614 | 0.217287155 | 0.877882692 | 0.24355749 | 0.275711396 | 0.417434693 |
| IKZF1 | 0.018255647 | 0.598362487 | 0.300091971 | 0.967316341 | 0.649788586 | 0.750121981 | 0.611041681 |
| IL10RA | 0.001541151 | 0.609528958 | 0.650068369 | 0.305665809 | 0.711796189 | 0.826030783 | 0.582705275 |
| IL10RB | 0.000149421 | 0.937467604 | 0.889492784 | 0.746942873 | 0.818210466 | 0.074947029 | 0.913794626 |
| IL17B | 0.001160674 | 0.912032754 | 0.378561316 | 0.644826238 | 0.195258084 | 0.427222078 | 0.13119085 |
| IL18 | 0.001124255 | 0.742743572 | 0.499903465 | 0.115859937 | 0.898189786 | 0.618552379 | 0.145305385 |
| IL32 | 0.000363156 | 0.350596831 | 0.409197865 | 0.129506431 | 0.142676646 | 0.021384878 | 0.062206734 |
| IL33 | 0.004901423 | 0.884159256 | 0.241936554 | 0.601375835 | 0.57012817 | 0.64406831 | 0.577112413 |
| IL4I1 | 0.008482845 | 0.218235368 | 0.474721005 | 0.032696681 | 0.81723908 | 0.372051601 | 0.451035809 |
| ING2 | 0.008040988 | 0.388145966 | 0.34594211 | 0.934687501 | 0.376531379 | 0.953499337 | 0.009543201 |
| IRAK1 | 0.000230235 | 0.094932991 | 0.272859176 | 0.914346569 | 0.466150225 | 0.868182383 | 0.298506313 |
| IRF2 | 0.001160682 | 0.362286376 | 0.913350678 | 0.648505261 | 0.635597413 | 0.005343441 | 0.028703328 |
| ITGA1 | 0.000179158 | 0.102110428 | 0.399761912 | 0.117051817 | 0.518146548 | 0.137613264 | 0.300408935 |
| ITGA7 | 0.001541151 | 0.189760413 | 0.759337471 | 0.894061585 | 0.757133936 | 0.00199761 | 0.262142052 |
| ITGAL | 0.00203366 | 0.733080247 | 0.50630806 | 0.389534732 | 0.682719173 | 0.656987861 | 0.881471692 |
| ITGB1 | 0.000511053 | 0.180210326 | 0.448245021 | 0.071408385 | 0.969370143 | 0.556790534 | 0.453493083 |
| ITGB2 | 0.00064614 | 0.488140386 | 0.698974419 | 0.594264388 | 0.507860921 | 0.348504958 | 0.611041681 |
| ITGB4 | 0.105794265 | 0.901882601 | 0.239252876 | 0.305665809 | 0.595304649 | 0.401576141 | 0.988592531 |
| ITGB5 | 0.001236828 | 0.329530272 | 0.792684961 | 0.750825362 | 0.676534803 | 0.006473768 | 0.296611753 |
| ITGB8 | 0.00203366 | 0.241842946 | 0.231328047 | 0.270815815 | 0.89988769 | 0.00293982 | 0.004915071 |
| JAML | 0.005184837 | 0.74516582 | 0.600294356 | 0.644826238 | 0.692189716 | 0.509648497 | 0.331948679 |
| KIF11 | 0.000154968 | 0.249658294 | 0.721411954 | 0.01059515 | 0.434790512 | 0.02827391 | 9.41E-06 |
| KIF14 | 0.00014406 | 0.539733949 | 0.886847672 | 0.025206445 | 0.181187019 | 0.587295623 | 0.00025812 |
| KIF23 | 0.00014406 | 0.968071511 | 0.987979176 | 0.032696681 | 0.261237425 | 0.889407474 | 0.001241277 |
| KIF2C | 0.00014406 | 0.431789874 | 0.852586381 | 0.108907809 | 0.533898526 | 0.391581908 | 0.000943557 |
| KIR2DL4 | 0.049840074 | 0.631413921 | 0.690932838 | 0.433734472 | 0.439104122 | 0.669276154 | 0.353692724 |
| KRTCAP2 | 0.000338855 | 0.527106997 | 0.384939408 | 0.141573954 | 0.286887476 | 0.291828409 | 0.005576483 |
| LAPTM5 | 0.000316083 | 0.79411042 | 0.448245021 | 0.762510381 | 0.802716276 | 0.847051883 | 0.340156485 |
| LCK | 0.002830216 | 0.443129395 | 0.480950563 | 0.894061585 | 0.39147975 | 0.025790647 | 0.605325688 |
| LCP2 | 0.000897411 | 0.574129198 | 0.061495975 | 0.786041031 | 0.781336143 | 0.521235121 | 0.493821309 |
| LDLRAD3 | 0.000214396 | 0.443129395 | 0.426512782 | 0.153009809 | 0.00117048 | 0.191786155 | 0.160554179 |
| LEPROT | 0.000154968 | 0.033350244 | 0.274326261 | 0.436266805 | 0.147313403 | 0.014142228 | 0.023503296 |
| LGALS3 | 0.000840865 | 0.047284421 | 0.166224281 | 0.45768745 | 0.210484613 | 2.97E-05 | 0.030854669 |
| LIMS1 | 0.00014406 | 0.134389615 | 0.530155746 | 0.282116569 | 0.403174673 | 0.137613264 | 0.429262308 |
| LMNA | 0.04013881 | 0.030783278 | 0.691552153 | 0.418375101 | 0.232359791 | 5.95E-05 | 0.830184899 |
| LOX | 0.000149421 | 0.023875286 | 0.635674058 | 0.801838912 | 0.277893452 | 0.00199761 | 0.344308749 |
| LOXL1 | 0.000624994 | 0.033885048 | 0.512755552 | 0.448435686 | 0.974154058 | 0.008241171 | 0.04966242 |
| LPCAT1 | 0.000957464 | 0.789175742 | 0.280248422 | 0.644826238 | 0.676650226 | 0.030960511 | 0.522622411 |
| LST1 | 0.001589863 | 0.781789614 | 0.241936554 | 0.130806462 | 0.659344765 | 0.896500935 | 0.091188248 |
| LTBR | 0.003278988 | 0.458510276 | 0.275798724 | 0.266383582 | 0.865290821 | 0.054313484 | 0.517322408 |
| LTF | 0.00014406 | 0.846386342 | 0.446243741 | 0.914346569 | 0.341623735 | 0.001471228 | 0.007594808 |
| LUM | 0.00044619 | 0.988503072 | 0.829024937 | 1 | 0.284981324 | 0.109296353 | 0.910555006 |
| LY75 | 0.010205286 | 0.796580866 | 0.568100902 | 0.587191638 | 0.94159363 | 0.099718476 | 0.175675859 |
| LYN | 0.000402678 | 0.411443322 | 0.519245571 | 0.95099165 | 0.600816525 | 0.38664191 | 0.058847685 |
| LYZ | 0.000172798 | 0.871534596 | 0.243286306 | 0.442327304 | 0.417952708 | 0.105381374 | 0.408112399 |
| MAN2B1 | 0.000222183 | 0.446946726 | 0.662164489 | 0.601375835 | 0.56609236 | 0.334842013 | 0.639972879 |
| MCM2 | 0.000154968 | 0.520850535 | 0.411100835 | 0.226761424 | 0.373913071 | 0.798197983 | 0.005506903 |
| MFGE8 | 0.000416721 | 0.019160855 | 0.50630806 | 0.378345633 | 0.02554268 | 0.556790534 | 0.117205497 |
| MGAT1 | 0.000172798 | 0.135224808 | 0.918663828 | 0.470188126 | 0.886992631 | 0.317169359 | 0.25355055 |
| MILR1 | 0.000624994 | 0.74759059 | 0.124758601 | 0.412508569 | 0.891494106 | 0.946355458 | 0.225813618 |
| MIOS | 0.000214396 | 0.203066954 | 0.446243741 | 0.111187559 | 0.233625828 | 0.709665119 | 0.5743255 |
| MMP11 | 0.000528589 | 0.209969555 | 0.97996664 | 0.918410701 | 0.557674668 | 0.047911184 | 0.639972879 |
| MMP7 | 0.003092207 | 0.922197392 | 0.667027955 | 0.473342507 | 0.533910457 | 0.188750441 | 0.216561304 |
| MPEG1 | 0.015745678 | 0.680721546 | 0.007812593 | 0.801838912 | 0.238230249 | 0.160319778 | 0.23534471 |
| MS4A6A | 0.00014406 | 0.85642837 | 0.281742434 | 0.604945902 | 0.87588079 | 0.416851333 | 0.18094548 |
| MS4A7 | 0.00027477 | 0.927284558 | 0.061495975 | 0.801838912 | 0.985763959 | 0.917828764 | 0.900845276 |
| MSN | 0.000222183 | 0.085803244 | 0.577214386 | 0.215169933 | 0.057507184 | 1.56E-05 | 0.187696412 |
| MSR1 | 0.000154968 | 0.904418716 | 0.436313984 | 0.801838912 | 0.774000207 | 0.165730284 | 0.645827305 |
| MT1X | 0.004632097 | 0.59614038 | 0.12808168 | 0.5388088 | 0.568146713 | 0.065243358 | 0.161775466 |
| MYBL2 | 0.00014406 | 0.350596831 | 0.23791894 | 0.119464441 | 0.297715643 | 0.234562679 | 0.183623894 |
| MYC | 0.000375908 | 0.518773579 | 0.926640293 | 0.68575557 | 0.567780886 | 0.00891981 | 0.001029541 |
| MYD88 | 0.000192544 | 0.374217073 | 0.777242578 | 0.655889027 | 0.63895685 | 0.001426322 | 0.522622411 |
| MYDGF | 0.000222183 | 0.983393951 | 0.797850875 | 0.825686463 | 0.931525845 | 0.357807614 | 0.063361072 |
| MYO1F | 0.001744632 | 0.369074455 | 0.568100902 | 0.251265125 | 0.634707932 | 0.80513366 | 0.533305472 |
| MYOF | 0.000294749 | 0.078477033 | 0.502033542 | 0.619320191 | 0.280984489 | 0.051028304 | 0.504195177 |
| NCF1 | 0.000431221 | 0.281243616 | 0.795266796 | 0.012260471 | 0.300596655 | 0.847051883 | 0.336036454 |
| NEK4 | 0.035938498 | 0.725860317 | 0.749162923 | 0.044670571 | 0.099811906 | 0.868182383 | 0.325877533 |
| NEK6 | 0.000624994 | 0.607288261 | 0.307967697 | 0.678240487 | 0.913889454 | 0.000916864 | 0.546812792 |
| NKG7 | 0.000813849 | 0.303246034 | 0.842097068 | 0.291384339 | 0.072795006 | 0.287741007 | 0.913794626 |
| NLRC5 | 0.000265264 | 0.14913963 | 0.667027955 | 0.758609209 | 0.036081153 | 0.709665119 | 0.313953236 |
| NNMT | 0.000166651 | 0.762190927 | 0.966617304 | 0.375579588 | 0.47807834 | 0.01523615 | 0.204653735 |
| NOX4 | 0.000149421 | 0.618528252 | 0.774677202 | 0.549006232 | 0.915224245 | 0.279682549 | 0.207585008 |
| NPC2 | 0.000179158 | 0.456571447 | 0.868368785 | 0.236755856 | 0.039283487 | 0.021897089 | 0.263884208 |
| NPM1 | 0.00014406 | 0.388145966 | 0.844716846 | 0.031870442 | 0.889720614 | 0.676559909 | 0.152199517 |
| NRP2 | 0.000840865 | 0.808963222 | 0.679247616 | 0.587191638 | 0.405363308 | 0.861127637 | 0.035575053 |
| NSMCE2 | 0.000179158 | 0.740323869 | 0.728945875 | 0.145782919 | 0.973004194 | 0.612243038 | 0.588323299 |
| NT5E | 0.001317565 | 0.056534622 | 0.191066008 | 0.40959368 | 0.602278756 | 0.016403898 | 0.613908621 |
| NUP62 | 0.000363156 | 0.598362487 | 0.611988696 | 0.708485426 | 0.247994919 | 0.924951974 | 0.125046546 |
| ODF3B | 0.000840865 | 0.574129198 | 0.0480358 | 0.400922819 | 0.704873793 | 0.38664191 | 0.517322408 |
| OSMR | 0.000624994 | 0.353912037 | 0.900085249 | 0.542197368 | 0.642927542 | 8.05E-05 | 0.287259802 |
| P4HB | 0.00014406 | 0.510508749 | 0.027473593 | 0.857731355 | 0.20662257 | 0.020391678 | 0.613908621 |
| PAIP1 | 0.000149421 | 0.198557959 | 0.813400953 | 0.065205596 | 0.390266723 | 0.396560022 | 0.917035679 |
| PARP12 | 0.000338855 | 0.074748083 | 0.227436321 | 0.552426414 | 0.492870166 | 0.004519944 | 0.657601914 |
| PARP14 | 0.000813849 | 0.587289794 | 0.352838788 | 0.576656221 | 0.108283379 | 0.267884956 | 0.681405318 |
| PARVG | 0.000528589 | 0.799053352 | 0.065800604 | 0.213280289 | 0.799401313 | 0.637648327 | 0.340156485 |
| PCK2 | 0.000624994 | 0.15463063 | 0.92132178 | 0.80580135 | 0.42268497 | 0.798197983 | 0.191835214 |
| PCNA | 0.000154968 | 0.914572673 | 0.751702548 | 0.249155217 | 0.383180311 | 1 | 0.405801351 |
| PDCD5 | 0.000284596 | 0.759751493 | 0.504168411 | 0.934687501 | 0.106383199 | 0.960646954 | 0.541389592 |
| PDE3A | 0.018255647 | 0.462401749 | 0.278759802 | 0.230722478 | 0.288497327 | 0.26021256 | 0.024009146 |
| PDIA4 | 0.000149421 | 0.248343624 | 0.090557673 | 0.436266805 | 0.121820006 | 0.002391358 | 0.441282426 |
| PFN1 | 0.000149421 | 0.546103725 | 0.619053323 | 0.522026797 | 0.555131026 | 0.283692402 | 0.30423838 |
| PGGHG | 0.007619852 | 0.00531184 | 0.045447566 | 0.179625147 | 0.269417722 | 0.101578503 | 0.605325688 |
| PGLS | 0.000166651 | 0.450782695 | 0.452262834 | 0.942836582 | 0.530541626 | 0.113325448 | 0.091188248 |
| PHB | 0.000172798 | 0.531299175 | 0.377655851 | 0.421326693 | 0.759523357 | 0.459223452 | 0.514682879 |
| PIK3CG | 0.008259273 | 0.155560539 | 0.849961531 | 0.934687501 | 0.360235148 | 0.650514958 | 0.292846813 |
| PKMYT1 | 0.000305242 | 0.504355607 | 0.23791894 | 0.427266393 | 0.303794503 | 0.264029539 | 0.056693074 |
| PLA2R1 | 0.103853888 | 0.500275348 | 0.800437171 | 0.735334234 | 0.23185463 | 0.005197411 | 0.204653735 |
| PLAAT4 | 0.000461644 | 0.901882601 | 0.718906599 | 0.356568758 | 0.153314398 | 0.003026926 | 0.00324766 |
| PLK1 | 0.000192544 | 0.687778077 | 0.416841183 | 0.155975702 | 0.357961396 | 0.812084703 | 0.003468504 |
| PLOD3 | 0.00266698 | 0.043824516 | 0.128923109 | 0.442327304 | 0.041468457 | 0.000274942 | 0.742272495 |
| PML | 0.001744632 | 0.186536475 | 0.536757294 | 0.68575557 | 0.719403822 | 0.252693596 | 0.807959156 |
| PNPT1 | 0.020608188 | 0.585086688 | 0.145738936 | 0.100156382 | 0.149534034 | 0.07206127 | 0.038924313 |
| POSTN | 0.000192544 | 0.201932776 | 0.777242578 | 0.330483273 | 0.918653935 | 0.000491546 | 0.331948679 |
| POU4F3 | 0.018686812 | 0.30315694 | 0.50622971 | 0.226683682 | 0.6370925 | 0.334769674 | 0.781147402 |
| PPP1R14B | 0.00014406 | 0.818903828 | 0.92132178 | 0.902168023 | 0.976863878 | 0.279682549 | 0.666489175 |
| PPP1R18 | 0.00014406 | 0.345661074 | 0.448245021 | 0.667027818 | 0.601435581 | 0.308566689 | 0.849345009 |
| PPP1R8 | 0.001972559 | 0.701972474 | 0.847338344 | 0.102289852 | 0.800039419 | 0.475714289 | 0.096800345 |
| PRDX4 | 0.00014406 | 0.945111698 | 0.252882803 | 0.719950014 | 0.447034089 | 0.057773278 | 0.767103945 |
| PRKAB1 | 0.00016071 | 0.398797089 | 0.173513171 | 0.12693649 | 0.038729588 | 0.411721924 | 0.25355055 |
| PRKD2 | 0.000185738 | 0.089971422 | 0.701454959 | 0.991826942 | 0.410461282 | 0.061414329 | 0.292846813 |
| PRMT6 | 0.000897411 | 0.103460669 | 0.081388696 | 0.881922907 | 0.634869199 | 0.663486603 | 0.35483024 |
| PROM1 | 0.026116391 | 0.901882601 | 0.691552153 | 0.486075679 | 0.658197125 | 0.117470649 | 0.969043586 |
| PRSS23 | 0.000363156 | 0.801527854 | 0.478869111 | 0.918410701 | 0.313801475 | 0.847051883 | 0.776479306 |
| PSMA2 | 0.000238561 | 0.620787116 | 0.91069554 | 0.910284675 | 0.452742625 | 0.132921487 | 0.356958646 |
| PSMB10 | 0.000511053 | 0.970624586 | 0.440270521 | 0.424290466 | 0.357403563 | 0.149900847 | 0.224252278 |
| PSMB8 | 0.00014406 | 0.965518764 | 0.628527751 | 0.934687501 | 0.806761239 | 0.045923278 | 0.135415993 |
| PSMB9 | 0.000199584 | 0.996167573 | 0.388613173 | 0.881922907 | 0.711672792 | 0.135251658 | 0.426881326 |
| PSME2 | 0.00014406 | 0.51670091 | 0.607298856 | 0.470188126 | 0.711109197 | 0.271778886 | 0.639972879 |
| PTGER4 | 0.019166858 | 0.428047729 | 0.749162923 | 0.857731355 | 0.83959406 | 0.115383411 | 0.102685338 |
| PTPN18 | 0.000528589 | 0.054895765 | 0.945279363 | 0.186360387 | 0.830851868 | 0.004648667 | 0.773350491 |
| PTPN22 | 0.000179158 | 0.179171651 | 0.711408736 | 0.793929404 | 0.925454547 | 0.018977349 | 0.645827305 |
| PTPN6 | 0.00064614 | 0.706727437 | 0.235266843 | 0.333034822 | 0.710738819 | 0.702997638 | 0.596796937 |
| PTPRC | 0.002438211 | 0.278393974 | 0.414922501 | 0.967316341 | 0.790311282 | 0.605962321 | 0.361239525 |
| PXDN | 0.000402678 | 0.119267574 | 0.289293452 | 0.689524858 | 0.06700525 | 0.903602679 | 0.85895929 |
| RAB31 | 0.000192544 | 0.638985468 | 0.963948439 | 0.047464202 | 0.965117709 | 0.00740829 | 0.003702933 |
| RAB34 | 0.00203366 | 0.008054066 | 0.02891572 | 0.378345633 | 0.382815558 | 2.63E-05 | 0.006162315 |
| RAC2 | 0.000327284 | 0.541853069 | 0.99065033 | 0.489287675 | 0.91122863 | 0.275711396 | 0.839753084 |
| RAD54L | 0.00044619 | 0.578500524 | 0.886847672 | 0.179625147 | 0.39432646 | 0.432463957 | 0.000734723 |
| RARRES1 | 0.00229583 | 0.245728833 | 0.550083234 | 0.486075679 | 0.25302745 | 5.31E-05 | 0.121076368 |
| RB1 | 0.000988867 | 0.554654316 | 0.530155746 | 0.293732906 | 0.576783278 | 0.515424907 | 0.000779586 |
| RBCK1 | 0.00291521 | 0.004955639 | 0.259896913 | 0.343367789 | 0.239011819 | 0.123910462 | 0.344308749 |
| RBL1 | 0.000154968 | 0.721060482 | 0.689084593 | 0.136108021 | 0.072111216 | 0.982106493 | 0.008884519 |
| RBP1 | 0.000988867 | 0.407806045 | 0.487224377 | 0.489287675 | 0.069898626 | 1.38E-05 | 0.792176878 |
| REEP4 | 0.000199584 | 0.082922607 | 0.621416085 | 0.356568758 | 0.901761665 | 0.101578503 | 0.026963386 |
| RFLNB | 0.018706399 | 0.609528958 | 0.581796808 | 0.68575557 | 0.345077572 | 0.38174013 | 0.678411875 |
| RGS1 | 0.001021221 | 0.80400435 | 0.607298856 | 0.45768745 | 0.791125881 | 0.291828409 | 0.197457498 |
| RGS19 | 0.000154968 | 0.494187943 | 0.178863953 | 0.762510381 | 0.514358991 | 0.498198143 | 0.026128094 |
| RHOD | 0.150954188 | 0.079021892 | 0.217287155 | 0.308090437 | 0.268198501 | 0.000755248 | 0.338092439 |
| RIN2 | 0.001541151 | 0.711493872 | 0.723920301 | 0.837672311 | 0.513896319 | 0.008462068 | 0.138652984 |
| RNASE6 | 0.000247168 | 0.706727437 | 0.23394867 | 0.209536995 | 0.65355802 | 0.188750441 | 0.093560546 |
| ROMO1 | 0.000154968 | 0.244428702 | 0.961279978 | 0.641155892 | 0.529681435 | 0.165730284 | 0.105293059 |
| RPA1 | 0.000247168 | 0.382886021 | 0.309559107 | 0.3646408 | 0.869775898 | 0.833024756 | 0.795326753 |
| RPL10 | 0.00014406 | 0.218235368 | 0.831635701 | 0.151543044 | 0.831047821 | 0.036995831 | 0.270932595 |
| RPL12 | 0.000149421 | 0.089366176 | 0.541181178 | 0.512088176 | 0.579116259 | 0.058966491 | 0.004161497 |
| RPL13A | 0.000149421 | 0.301744548 | 0.381286954 | 0.505517686 | 0.565293529 | 0.20428828 | 0.842947823 |
| RPL35A | 0.000172798 | 0.063047113 | 0.674349407 | 0.959151854 | 0.263391706 | 0.171277028 | 0.196040748 |
| RPL7A | 0.000149421 | 0.016537888 | 0.607298856 | 0.482875121 | 0.645097444 | 0.012472491 | 0.030539102 |
| RPS10 | 0.00014406 | 0.110426017 | 0.347658175 | 0.31791587 | 0.229937601 | 0.224136902 | 0.387595969 |
| RPS19 | 0.00014406 | 0.623049561 | 0.726431616 | 0.454591683 | 0.704239639 | 0.165730284 | 0.605325688 |
| RPS2 | 0.00014406 | 0.140320433 | 0.141158959 | 0.674494855 | 0.458721188 | 0.20428828 | 0.005438107 |
| RPS27L | 0.000206865 | 0.514632541 | 0.322485661 | 0.112341474 | 0.483405254 | 0.939215891 | 3.60E-05 |
| RUBCNL | 0.002438211 | 0.206497314 | 0.939950407 | 0.890012457 | 0.738936369 | 6.67E-05 | 0.000322063 |
| RUNX2 | 0.035938498 | 0.781789614 | 0.701454959 | 0.545596531 | 0.301086829 | 0.443057835 | 0.493821309 |
| RUNX3 | 0.000192544 | 0.323216744 | 0.160162005 | 0.502249166 | 0.019897643 | 0.308566689 | 0.166730808 |
| S100A4 | 0.000166651 | 0.374217073 | 0.541181178 | 0.615712655 | 0.315805497 | 0.000338366 | 0.096800345 |
| S100A6 | 0.000222183 | 0.248343624 | 0.530155746 | 0.535430882 | 0.329567861 | 0.003399392 | 0.021110448 |
| SAA1 | 0.000166651 | 0.252302203 | 0.733983125 | 0.622936918 | 0.075903616 | 0.001564975 | 0.040098672 |
| SAMD9 | 0.000316083 | 0.645867075 | 0.691552153 | 0.120685276 | 0.468085612 | 0.197965027 | 0.729954833 |
| SAMD9L | 0.000624994 | 0.260350791 | 0.736506066 | 0.80580135 | 0.582875977 | 0.06394571 | 0.34222859 |
| SAMHD1 | 0.000214396 | 0.904418716 | 0.728945875 | 0.801838912 | 0.490321376 | 0.896500935 | 0.985333581 |
| SEM1 | 0.000154968 | 0.269963239 | 0.495657742 | 0.445375526 | 0.096151273 | 0.165730284 | 0.207585008 |
| SERPINB6 | 0.000389078 | 0.334317491 | 0.570372809 | 0.766417597 | 0.6295038 | 5.31E-05 | 0.000702663 |
| SERPINE1 | 0.00049406 | 0.607288261 | 0.650068369 | 0.853711755 | 0.461308245 | 0.00740829 | 0.109755752 |
| SERPING1 | 0.000350809 | 0.234201374 | 0.300091971 | 0.460795015 | 0.824670733 | 0.003813136 | 0.00135198 |
| SLAMF8 | 0.000206865 | 0.866493697 | 0.375848317 | 0.967316341 | 0.983030082 | 0.343911796 | 0.611041681 |
| SLC15A3 | 0.000416721 | 0.272753807 | 0.438289686 | 0.275298326 | 0.660921736 | 0.188750441 | 0.374274267 |
| SLC30A5 | 0.000172798 | 0.14913963 | 0.300091971 | 0.177969961 | 0.390961681 | 0.024054143 | 0.602476704 |
| SLC35B1 | 0.000185738 | 0.422470052 | 0.977296205 | 0.80976878 | 0.61095783 | 0.191786155 | 0.985333581 |
| SLC40A1 | 0.00016071 | 0.881631864 | 0.372249308 | 0.877882692 | 0.832051633 | 0.889407474 | 0.374274267 |
| SLFN11 | 0.004253179 | 0.655089823 | 0.800437171 | 0.10445933 | 0.619202803 | 0.179856079 | 0.705530209 |
| SMC5 | 0.000737556 | 0.321650765 | 0.998664303 | 0.49574581 | 0.543999479 | 0.291828409 | 0.029916278 |
| SMC6 | 0.006472498 | 0.709109231 | 0.977296205 | 0.043592621 | 0.110412651 | 0.014498911 | 0.000112277 |
| SOX9 | 0.00368367 | 0.329530272 | 0.87892001 | 0.445375526 | 0.159000402 | 0.042155407 | 0.050139123 |
| SPI1 | 0.00058462 | 0.945111698 | 0.34594211 | 0.300854613 | 0.83511053 | 0.743327742 | 0.359095076 |
| SPON2 | 0.001088888 | 0.263072714 | 0.512755552 | 0.667027818 | 0.212208009 | 0.010979752 | 0.969043586 |
| SPP1 | 0.00229583 | 0.769523327 | 0.536757294 | 0.045217924 | 0.874514964 | 0.312848551 | 0.066324525 |
| SPRY2 | 0.012873642 | 0.025096298 | 0.301656276 | 0.652192883 | 0.818857938 | 0.000161684 | 0.011925534 |
| SPTLC3 | 0.009432215 | 0.045181936 | 0.265604327 | 0.532063669 | 0.03420884 | 0.422018239 | 0.920278112 |
| SRGN | 0.000294749 | 0.874057018 | 0.235266843 | 0.789982528 | 0.819667342 | 0.300119756 | 0.176982408 |
| SSR3 | 0.000179158 | 0.683070656 | 0.604959969 | 0.778174563 | 0.468955772 | 0.066562646 | 0.070664292 |
| SSR4 | 0.00014406 | 0.657403827 | 0.795266796 | 0.704678377 | 0.513861566 | 0.515424907 | 0.560487369 |
| ST6GALNAC2 | 0.012873642 | 0.531299175 | 0.635674058 | 0.841676126 | 0.065513802 | 0.372051601 | 0.289114091 |
| ST8SIA4 | 0.001744632 | 0.85894258 | 0.290819865 | 0.403800781 | 0.328263846 | 0.271778886 | 0.296611753 |
| STAB1 | 0.000363156 | 0.484130965 | 0.761887709 | 0.5388088 | 0.539024489 | 0.448409914 | 0.855752132 |
| STING1 | 0.000926987 | 0.476165983 | 0.73903185 | 0.841676126 | 0.801409055 | 0.245327368 | 0.568770865 |
| STK10 | 0.000402678 | 0.18440978 | 0.530155746 | 0.898113475 | 0.450707955 | 0.974951106 | 0.533305472 |
| SULF2 | 0.007218595 | 0.927284558 | 0.499903465 | 0.502249166 | 0.158523864 | 0.003399392 | 0.541389592 |
| SYK | 0.000624994 | 0.863975268 | 0.454279348 | 0.58366994 | 0.945659295 | 0.974951106 | 0.672440229 |
| TAF10 | 0.000402678 | 0.395227317 | 0.134933876 | 0.282116569 | 0.203237097 | 0.224136902 | 0.094362226 |
| TAGLN | 0.000988867 | 0.10077425 | 0.547850973 | 0.644826238 | 0.233460644 | 0.011855081 | 0.145305385 |
| TAGLN2 | 0.000214396 | 0.397009782 | 0.684159405 | 0.601375835 | 0.393068235 | 4.38E-05 | 0.20175268 |
| TANK | 0.000179158 | 0.086388964 | 0.139358254 | 0.637494296 | 0.636085892 | 0.004916118 | 0.068156766 |
| TAP1 | 0.000185738 | 0.634414889 | 0.703938684 | 0.70087871 | 0.196872678 | 0.245327368 | 0.164239058 |
| TBC1D2B | 0.005482978 | 0.138605732 | 0.676796803 | 0.926545258 | 0.933983107 | 0.544808458 | 0.278108921 |
| TBCA | 0.000179158 | 0.671356234 | 0.723920301 | 0.817718226 | 0.909245389 | 0.38174013 | 0.101827604 |
| TBX2 | 0.000214396 | 0.085803244 | 0.961279978 | 0.719950014 | 0.892985363 | 0.040371735 | 0.274504741 |
| TBXAS1 | 0.001198196 | 0.970624586 | 0.347658175 | 0.542197368 | 0.958850387 | 0.791278198 | 0.232136544 |
| TCEA1 | 0.000149421 | 0.580692037 | 0.460359201 | 0.002268762 | 0.730039419 | 0.663486603 | 0.599633775 |
| TCF3 | 0.000247168 | 0.8968134 | 0.409197865 | 0.08526482 | 0.119906263 | 0.005965334 | 0.080749587 |
| TERT | 0.000897065 | 0.081505084 | 0.403509886 | 0.845679982 | 0.937645629 | 0.000193303 | 0.166723114 |
| TFPI | 0.000154968 | 0.801527854 | 0.889492784 | 0.735334234 | 0.071870133 | 0.105381374 | 0.165481404 |
| TGFBI | 0.000149421 | 0.018196282 | 0.756789848 | 0.906225125 | 0.802956289 | 0.006300115 | 0.862168777 |
| THEMIS2 | 0.008259273 | 0.616272987 | 0.652480357 | 0.351250456 | 0.416673156 | 0.432463957 | 0.178296182 |
| TIMP1 | 0.000363156 | 0.295788165 | 0.394163688 | 0.562749267 | 0.217527379 | 4.05E-05 | 0.004791631 |
| TM4SF18 | 0.000926987 | 0.446946726 | 0.026776095 | 0.454591683 | 0.882170761 | 0.960646954 | 0.367720925 |
| TMED3 | 0.000402678 | 0.607288261 | 0.246001667 | 0.80976878 | 0.71170011 | 0.096079972 | 0.18094548 |
| TMEM243 | 0.000256066 | 0.335923144 | 0.929300794 | 0.505517686 | 0.360834784 | 0.252693596 | 0.639972879 |
| TMEM43 | 0.000154968 | 0.500275348 | 0.335759324 | 0.489287675 | 0.775311007 | 0.903602679 | 0.022519286 |
| TNC | 0.000154968 | 0.261709307 | 0.510601644 | 0.758609209 | 0.092645508 | 0.010162331 | 0.995110949 |
| TNFAIP2 | 0.022143131 | 0.051736758 | 0.74409185 | 0.244972632 | 0.624706065 | 0.005646669 | 0.089633757 |
| TNFRSF10B | 0.000230235 | 0.001728395 | 0.995992924 | 0.502249166 | 0.676209545 | 0.003302555 | 3.73E-05 |
| TNFRSF11B | 0.00368367 | 0.003407295 | 0.829024937 | 0.967316341 | 0.507646908 | 0.000239047 | 0.029002526 |
| TOR4A | 0.000511053 | 0.254965567 | 0.588702143 | 0.433254592 | 0.805210677 | 0.709665119 | 0.757762551 |
| TP53 | 0.000172798 | 0.089971422 | 0.694022993 | 0.697086512 | 0.125344149 | 0.729799537 | 0.936509091 |
| TRIM22 | 0.000389078 | 0.048366147 | 0.255672457 | 0.508797373 | 0.834701181 | 0.029590997 | 0.002170738 |
| TRIM47 | 0.000338855 | 0.574129198 | 0.19797459 | 0.020892073 | 0.336690699 | 0.077926479 | 0.00473097 |
| TSPAN18 | 0.026116391 | 0.377669983 | 0.424568062 | 0.298468037 | 0.218196091 | 0.0302691 | 0.92352187 |
| TWF1 | 0.000172798 | 0.527106997 | 0.349379645 | 0.002555115 | 0.771689742 | 0.188750441 | 0.203199437 |
| TWIST1 | 0.038411199 | 0.234201374 | 0.414922501 | 0.228735846 | 0.03666923 | 0.448409914 | 0.336036454 |
| TXNDC5 | 0.00203366 | 0.084641431 | 0.193348875 | 0.015409515 | 0.537896189 | 0.182785583 | 0.369897388 |
| TXNIP | 0.000192544 | 0.318533692 | 0.342526201 | 0.801838912 | 0.775504889 | 0.271778886 | 0.711609135 |
| TYMP | 0.000565356 | 0.899347488 | 0.116744976 | 0.758609209 | 0.515318146 | 0.362517004 | 0.473421012 |
| TYMS | 0.000868712 | 0.922197392 | 0.818601029 | 0.242899918 | 0.356540194 | 0.875247641 | 0.369897388 |
| TYROBP | 0.000206865 | 0.801527854 | 0.255672457 | 0.28904843 | 0.477762053 | 0.367265022 | 0.158132529 |
| UBE2A | 0.000179158 | 0.718664665 | 0.536757294 | 0.230722478 | 0.757871632 | 0.287741007 | 0.634140782 |
| UBE2C | 0.00014406 | 0.47815047 | 0.82641606 | 0.28672517 | 0.709969794 | 0.367265022 | 0.005576483 |
| UBE2D4 | 0.000528589 | 0.548235234 | 0.74409185 | 0.789982528 | 0.37082593 | 0.784374822 | 0.073246985 |
| VAT1 | 0.000192544 | 0.655089823 | 0.790105397 | 0.942836582 | 0.098842489 | 0.840031969 | 0.374274267 |
| VCAM1 | 0.000624994 | 0.811445552 | 0.315978986 | 0.633841527 | 0.449843733 | 0.833024756 | 0.648762796 |
| VCAN | 0.000265264 | 0.629858208 | 0.541181178 | 0.389534732 | 0.970068151 | 0.020391678 | 0.04423252 |
| VIM | 0.00014406 | 0.282675836 | 0.048415469 | 0.735334234 | 0.247960795 | 0.004648667 | 0.483562779 |
| VOPP1 | 0.00027477 | 0.47815047 | 0.591012302 | 0.257669527 | 0.300629633 | 0.018082811 | 0.190448221 |
| VTCN1 | 0.017814366 | 0.016829084 | 0.471622633 | 0.104459066 | 0.468494968 | 0.000239044 | 1.01E-08 |
| VWF | 0.001913147 | 0.75001786 | 0.99065033 | 0.898113475 | 0.754295124 | 0.188750441 | 0.35483024 |
| WRN | 0.00203366 | 0.080120841 | 0.726431616 | 0.054772964 | 0.338496962 | 0.422018239 | 0.009772246 |
| YBX1 | 0.00014406 | 0.153704948 | 0.937286922 | 0.078956094 | 0.365129703 | 0.085798477 | 0.006556042 |
| ZCCHC7 | 0.000185738 | 0.155560539 | 0.823809098 | 0.04201694 | 0.989803789 | 0.12173393 | 9.58E-07 |
| ZKSCAN3 | 0.01075152 | 0.66204168 | 0.092487619 | 0.100156382 | 0.020775966 | 0.00403672 | 0.260407859 |
| ZMPSTE24 | 0.000389078 | 0.74516582 | 0.23263574 | 0.013560302 | 0.338710387 | 0.80513366 | 0.599633775 |
| ZNF277 | 0.001198196 | 0.874057018 | 0.17563895 | 0.04201694 | 0.362584127 | 0.770619356 | 0.227382703 |
| ZYX | 0.000172798 | 0.129461959 | 0.998664303 | 0.80976878 | 0.162752763 | 0.004648667 | 0.26915852 |

Supplementary Table 7

|  | coef | se | z | p | HR | HRse | HRz | HRp | HRCILL | HRCIUL |
| --- | --- | --- | --- | --- | --- | --- | --- | --- | --- | --- |
| AEBP1 | 0.651 | 0.176 | 3.7 | 0 | 1.917 | 0.337 | 2.72 | 0.007 | 1.435 | 2.56 |
| ARPC1B | 0.431 | 0.174 | 2.48 | 0.013 | 1.539 | 0.268 | 2.014 | 0.044 | 1.156 | 2.049 |
| BMPR1A | -0.393 | 0.175 | -2.248 | 0.025 | 0.675 | 0.118 | -2.754 | 0.006 | 0.506 | 0.9 |
| C1R | 0.376 | 0.173 | 2.175 | 0.03 | 1.457 | 0.252 | 1.813 | 0.07 | 1.096 | 1.936 |
| C1S | 0.407 | 0.173 | 2.348 | 0.019 | 1.502 | 0.26 | 1.929 | 0.054 | 1.13 | 1.998 |
| CALHM6 | 0.431 | 0.174 | 2.475 | 0.013 | 1.538 | 0.268 | 2.011 | 0.044 | 1.155 | 2.048 |
| CHI3L2 | 0.421 | 0.176 | 2.4 | 0.016 | 1.524 | 0.267 | 1.959 | 0.05 | 1.142 | 2.034 |
| CLEC10A | 0.397 | 0.179 | 2.224 | 0.026 | 1.488 | 0.266 | 1.836 | 0.066 | 1.109 | 1.995 |
| CLEC7A | 0.385 | 0.173 | 2.224 | 0.026 | 1.47 | 0.255 | 1.846 | 0.065 | 1.106 | 1.955 |
| COL5A1 | 0.369 | 0.175 | 2.106 | 0.035 | 1.446 | 0.253 | 1.762 | 0.078 | 1.084 | 1.928 |
| DOK3 | 0.362 | 0.173 | 2.09 | 0.037 | 1.436 | 0.249 | 1.754 | 0.079 | 1.08 | 1.91 |
| DRAM1 | 0.373 | 0.176 | 2.124 | 0.034 | 1.453 | 0.255 | 1.772 | 0.076 | 1.088 | 1.94 |
| F2R | -0.363 | 0.173 | -2.094 | 0.036 | 0.696 | 0.121 | -2.524 | 0.012 | 0.523 | 0.925 |
| FCGR2B | 0.357 | 0.172 | 2.071 | 0.038 | 1.429 | 0.246 | 1.742 | 0.082 | 1.076 | 1.897 |
| FDXR | 0.428 | 0.172 | 2.482 | 0.013 | 1.534 | 0.265 | 2.019 | 0.043 | 1.155 | 2.037 |
| FXYD5 | 0.389 | 0.175 | 2.23 | 0.026 | 1.476 | 0.258 | 1.848 | 0.065 | 1.108 | 1.967 |
| GRN | 0.659 | 0.176 | 3.753 | 0 | 1.933 | 0.339 | 2.749 | 0.006 | 1.448 | 2.58 |
| HEXB | 0.508 | 0.175 | 2.913 | 0.004 | 1.663 | 0.29 | 2.284 | 0.022 | 1.248 | 2.216 |
| HMGA2 | 0.354 | 0.174 | 2.031 | 0.042 | 1.425 | 0.248 | 1.711 | 0.087 | 1.07 | 1.898 |
| IKBIP | 0.424 | 0.183 | 2.32 | 0.02 | 1.528 | 0.279 | 1.891 | 0.059 | 1.131 | 2.064 |
| ITGB5 | 0.383 | 0.175 | 2.193 | 0.028 | 1.466 | 0.256 | 1.822 | 0.068 | 1.1 | 1.954 |
| JAML | 0.352 | 0.174 | 2.03 | 0.042 | 1.422 | 0.247 | 1.711 | 0.087 | 1.069 | 1.892 |
| LOXL1 | 0.415 | 0.174 | 2.384 | 0.017 | 1.514 | 0.264 | 1.951 | 0.051 | 1.137 | 2.017 |
| ODF3B | 0.436 | 0.177 | 2.459 | 0.014 | 1.547 | 0.275 | 1.993 | 0.046 | 1.155 | 2.072 |
| OSMR | 0.519 | 0.176 | 2.956 | 0.003 | 1.681 | 0.295 | 2.306 | 0.021 | 1.259 | 2.244 |
| P4HB | 0.399 | 0.175 | 2.281 | 0.023 | 1.491 | 0.261 | 1.881 | 0.06 | 1.118 | 1.989 |
| PSMA2 | 0.368 | 0.173 | 2.133 | 0.033 | 1.445 | 0.249 | 1.784 | 0.074 | 1.088 | 1.92 |
| PTPN18 | 0.461 | 0.173 | 2.656 | 0.008 | 1.585 | 0.275 | 2.128 | 0.033 | 1.192 | 2.108 |
| PTPN22 | 0.409 | 0.174 | 2.355 | 0.019 | 1.505 | 0.261 | 1.933 | 0.053 | 1.131 | 2.003 |
| RAB31 | 0.403 | 0.175 | 2.305 | 0.021 | 1.496 | 0.261 | 1.898 | 0.058 | 1.122 | 1.993 |
| RARRES1 | 0.416 | 0.178 | 2.341 | 0.019 | 1.516 | 0.27 | 1.915 | 0.055 | 1.132 | 2.031 |
| RHOD | 0.404 | 0.176 | 2.291 | 0.022 | 1.498 | 0.264 | 1.885 | 0.059 | 1.121 | 2.003 |
| RPL13A | -0.395 | 0.174 | -2.275 | 0.023 | 0.674 | 0.117 | -2.79 | 0.005 | 0.506 | 0.896 |
| RPL7A | -0.365 | 0.173 | -2.11 | 0.035 | 0.694 | 0.12 | -2.547 | 0.011 | 0.522 | 0.923 |
| SAA1 | 0.352 | 0.176 | 2.005 | 0.045 | 1.422 | 0.25 | 1.69 | 0.091 | 1.065 | 1.898 |
| SEM1 | 0.44 | 0.175 | 2.513 | 0.012 | 1.553 | 0.272 | 2.033 | 0.042 | 1.164 | 2.071 |
| SLC40A1 | -0.385 | 0.175 | -2.195 | 0.028 | 0.68 | 0.119 | -2.678 | 0.007 | 0.51 | 0.908 |
| SLFN11 | 0.532 | 0.176 | 3.022 | 0.003 | 1.703 | 0.3 | 2.343 | 0.019 | 1.275 | 2.276 |
| TGFBI | 0.36 | 0.176 | 2.05 | 0.04 | 1.433 | 0.252 | 1.722 | 0.085 | 1.074 | 1.913 |
| THEMIS2 | 0.368 | 0.173 | 2.126 | 0.034 | 1.444 | 0.25 | 1.779 | 0.075 | 1.087 | 1.919 |
| TMEM243 | 0.392 | 0.178 | 2.209 | 0.027 | 1.481 | 0.263 | 1.827 | 0.068 | 1.105 | 1.983 |
| TNFAIP2 | 0.389 | 0.175 | 2.221 | 0.026 | 1.476 | 0.259 | 1.839 | 0.066 | 1.106 | 1.97 |
| TNFRSF11B | 0.474 | 0.176 | 2.696 | 0.007 | 1.607 | 0.283 | 2.146 | 0.032 | 1.203 | 2.147 |
| TRIM47 | 0.382 | 0.174 | 2.199 | 0.028 | 1.465 | 0.255 | 1.827 | 0.068 | 1.101 | 1.95 |
| TWF1 | -0.374 | 0.175 | -2.139 | 0.032 | 0.688 | 0.12 | -2.594 | 0.009 | 0.516 | 0.917 |
| TWIST1 | 0.352 | 0.175 | 2.006 | 0.045 | 1.421 | 0.249 | 1.692 | 0.091 | 1.065 | 1.896 |
| ZCCHC7 | -0.377 | 0.173 | -2.184 | 0.029 | 0.686 | 0.118 | -2.653 | 0.008 | 0.516 | 0.911 |
| ZKSCAN3 | -0.398 | 0.174 | -2.286 | 0.022 | 0.672 | 0.117 | -2.808 | 0.005 | 0.504 | 0.894 |
| ZMPSTE24 | -0.394 | 0.177 | -2.228 | 0.026 | 0.674 | 0.119 | -2.731 | 0.006 | 0.504 | 0.902 |

Supplementary Table 8

|  | p | fc | adj.p | up_or_down |
| --- | --- | --- | --- | --- |
| A.443654 | 0.117164462 | 0.963059026 | 1 | down |
| A.770041 | 0.821469174 | 1.001656804 | 1 | up |
| ABT.263 | 0.290118651 | 1.00820019 | 1 | up |
| ABT.888 | 0.158554933 | 0.999450773 | 1 | down |
| AG.014699 | 0.304960663 | 1.001894015 | 1 | up |
| AICAR | 0.074873237 | 1.020977207 | 1 | up |
| AKT.inhibitor.VIII | 0.377875306 | 0.988324043 | 1 | down |
| AMG.706 | 0.066883996 | 0.991030099 | 1 | down |
| AP.24534 | 0.183541802 | 0.987581437 | 1 | down |
| AS601245 | 0.450977589 | 0.993567432 | 1 | down |
| ATRA | 0.001505693 | 1.039213843 | 0.207785598 | up |
| AUY922 | 1.92E-10 | 0.897495622 | 2.64E-08 | down |
| Axitinib | 0.017625814 | 0.997328084 | 1 | down |
| AZ628 | 0.632281404 | 1.001767331 | 1 | up |
| AZD.0530 | 2.51E-05 | 0.970508004 | 0.003464682 | down |
| AZD.2281 | 0.400792003 | 0.997895159 | 1 | down |
| AZD6244 | 0.001165455 | 0.97371348 | 0.160832821 | down |
| AZD6482 | 0.449057633 | 0.996047721 | 1 | down |
| AZD7762 | 1.62E-07 | 0.621346612 | 2.24E-05 | down |
| AZD8055 | 0.225704093 | 1.462891123 | 1 | up |
| BAY.61.3606 | 0.003675845 | 1.044367412 | 0.507266622 | up |
| Bexarotene | 0.096992927 | 0.996781022 | 1 | down |
| BI.2536 | 0.589656928 | 1.002332779 | 1 | up |
| BIBW2992 | 0.009392105 | 1.072769142 | 1 | up |
| Bicalutamide | 0.662178108 | 0.999375901 | 1 | down |
| BI.D1870 | 0.000847415 | 0.973499667 | 0.116943216 | down |
| BIRB.0796 | 0.002449196 | 0.984683304 | 0.337989001 | down |
| Bleomycin | 0.370989704 | 1.034254438 | 1 | up |
| BMS.509744 | 0.796666494 | 0.991048663 | 1 | down |
| BMS.536924 | 0.008714697 | 0.967667508 | 1 | down |
| BMS.708163 | 3.72E-10 | 1.011768443 | 5.13E-08 | up |
| BMS.754807 | 0.113469095 | 1.016387606 | 1 | up |
| Bortezomib | 0.000499807 | 1.046747992 | 0.068973315 | up |
| Bosutinib | 1.09E-09 | 0.972518153 | 1.50E-07 | down |
| Bryostatin.1 | 0.000950386 | 1.053893514 | 0.13115326 | up |
| BX.795 | 0.024951423 | 1.041375073 | 1 | up |
| Camptothecin | 0.055815615 | 0.999010358 | 1 | down |
| CCT007093 | 8.48E-08 | 1.035043822 | 1.17E-05 | up |
| CCT018159 | 3.23E-06 | 0.999983062 | 0.000445901 | down |
| CEP.701 | 0.723573177 | 0.908781482 | 1 | down |
| CGP.082996 | 0.523110662 | 0.991597317 | 1 | down |
| CGP.60474 | 0.329738465 | 1.000507564 | 1 | up |
| CHIR.99021 | 0.017322602 | 0.990819416 | 1 | down |
| CI.1040 | 1.13E-06 | 0.956862925 | 0.000156517 | down |
| Cisplatin | 0.145735874 | 1.002189953 | 1 | up |
| CMK | 0.001289101 | 0.980222306 | 0.177895913 | down |
| Cyclopamine | 0.282883048 | 1.012031603 | 1 | up |
| Cytarabine | 0.159502256 | 0.935288071 | 1 | down |
| Dasatinib | 0.022956255 | 0.976330604 | 1 | down |
| DMOG | 1.21E-07 | 0.968163586 | 1.66E-05 | down |
| Docetaxel | 0.591867006 | 0.999666908 | 1 | down |
| Doxorubicin | 5.84E-08 | 0.627697291 | 8.05E-06 | down |
| EHT.1864 | 4.47E-06 | 1.037817614 | 0.000616581 | up |
| Elesclomol | 0.022956255 | 0.979911414 | 1 | down |
| Embelin | 0.007347662 | 0.993910647 | 1 | down |
| Epothilone.B | 6.98E-05 | 0.961383189 | 0.009631747 | down |
| Erlotinib | 0.04919636 | 0.991953297 | 1 | down |
| Etoposide | 2.03E-05 | 1.13637228 | 0.002797796 | up |
| FH535 | 0.869069347 | 1.002207705 | 1 | up |
| FTI.277 | 0.006297504 | 0.98676766 | 0.869055487 | down |
| GDC.0449 | 0.053795888 | 1.000980865 | 1 | up |
| GDC0941 | 0.664501109 | 1.018867208 | 1 | up |
| Gefitinib | 0.206692707 | 0.998536854 | 1 | down |
| Gemcitabine | 0.000397595 | 1.537818902 | 0.054868104 | up |
| GNF.2 | 0.607442923 | 1.000405975 | 1 | up |
| GSK269962A | 9.03E-07 | 1.053172733 | 0.000124655 | up |
| GSK.650394 | 0.093813826 | 1.024618309 | 1 | up |
| GW.441756 | 3.59E-08 | 1.014469709 | 4.95E-06 | up |
| GW843682X | 0.093188146 | 0.998204397 | 1 | down |
| Imatinib | 0.001774595 | 0.994117162 | 0.244894082 | down |
| IPA.3 | 0.083625373 | 1.030919793 | 1 | up |
| JNJ.26854165 | 1.46E-07 | 0.961759092 | 2.02E-05 | down |
| JNK.9L | 0.718780603 | 1.107063274 | 1 | up |
| JNK.Inhibitor.VIII | 0.406196686 | 0.999056159 | 1 | down |
| JW.7.52.1 | 0.144851508 | 0.986665481 | 1 | down |
| KIN001.135 | 0.886736267 | 0.998788119 | 1 | down |
| KU.55933 | 1.75E-09 | 0.99311312 | 2.42E-07 | down |
| Lapatinib | 8.74E-07 | 0.896004636 | 0.000120648 | down |
| Lenalidomide | 0.303454183 | 0.99980807 | 1 | down |
| LFM.A13 | 0.002178468 | 0.999307068 | 0.300628534 | down |
| Metformin | 3.44E-06 | 1.014510585 | 0.000474454 | up |
| Methotrexate | 0.328152675 | 1.007445629 | 1 | up |
| MG.132 | 0.01559761 | 1.019346291 | 1 | up |
| Midostaurin | 0.312567398 | 1.059339836 | 1 | up |
| Mitomycin.C | 2.98E-09 | -0.287457108 | 4.11E-07 | down |
| MK.2206 | 0.929859391 | 1.004027037 | 1 | up |
| MS.275 | 3.11E-07 | 1.534930488 | 4.30E-05 | up |
| Nilotinib | 0.324995961 | 1.001598717 | 1 | up |
| NSC.87877 | 0.008796915 | 0.986256352 | 1 | down |
| NU.7441 | 0.002750394 | 0.976461577 | 0.379554421 | down |
| Nutlin.3a | 3.06E-05 | 1.01288197 | 0.004221402 | up |
| NVP.BEZ235 | 0.605206618 | 0.994393602 | 1 | down |
| NVP.TAE684 | 0.194314594 | 0.998485879 | 1 | down |
| Obatoclax.Mesylate | 0.014025604 | 0.449183983 | 1 | down |
| OSI.906 | 0.025578529 | 0.988754152 | 1 | down |
| PAC.1 | 8.20E-05 | 1.05115738 | 0.011311532 | up |
| Paclitaxel | 0.973189501 | 0.998447621 | 1 | down |
| Parthenolide | 0.87411077 | 1.000328607 | 1 | up |
| Pazopanib | 0.009658 | 0.99671124 | 1 | down |
| PD.0325901 | 4.15E-07 | 0.677041832 | 5.72E-05 | down |
| PD.0332991 | 0.001505693 | 0.961613654 | 0.207785598 | down |
| PD.173074 | 2.67E-07 | 0.948052911 | 3.69E-05 | down |
| PF.02341066 | 0.271562394 | 0.999748133 | 1 | down |
| PF.4708671 | 6.05E-08 | 1.0405031 | 8.35E-06 | up |
| PF.562271 | 0.000351995 | 0.96629396 | 0.048575324 | down |
| PHA.665752 | 0.82395973 | 1.000970067 | 1 | up |
| PLX4720 | 0.355784127 | 1.000582356 | 1 | up |
| Pyrimethamine | 0.000867142 | 0.977343592 | 0.119665582 | down |
| QS11 | 8.95E-06 | 1.043432668 | 0.001235118 | up |
| Rapamycin | 0.000275085 | 0.978761703 | 0.037961714 | down |
| RDEA119 | 4.04E-05 | 0.907194765 | 0.005579202 | down |
| RO.3306 | 2.64E-06 | 0.971322985 | 0.000364048 | down |
| Roscovitine | 2.72E-06 | 1.029864275 | 0.000375627 | up |
| Salubrinal | 3.49E-06 | 1.039942944 | 0.000481861 | up |
| SB.216763 | 0.013777664 | 1.005822414 | 1 | up |
| SB590885 | 0.240759782 | 0.9979607 | 1 | down |
| Shikonin | 2.76E-07 | -0.469664978 | 3.81E-05 | down |
| SL.0101.1 | 0.062257042 | 0.986382519 | 1 | down |
| Sorafenib | 0.036751313 | 1.024104211 | 1 | up |
| S.Trityl.L.cysteine | 0.559123216 | 1.00406177 | 1 | up |
| Sunitinib | 0.000109662 | 0.984815844 | 0.015133306 | down |
| Temsirolimus | 0.029158356 | 1.529490737 | 1 | up |
| Thapsigargin | 0.102258071 | 1.059750499 | 1 | up |
| Tipifarnib | 0.071790426 | 1.003317493 | 1 | up |
| TW.37 | 0.007071347 | 1.076216532 | 0.975845865 | up |
| Vinblastine | 0.226932452 | 0.990975953 | 1 | down |
| Vinorelbine | 1.35E-05 | 0.957928144 | 0.0018661 | down |
| Vorinostat | 0.112741158 | 1.05414226 | 1 | up |
| VX.680 | 0.828946138 | 0.999905285 | 1 | down |
| VX.702 | 0.000105423 | 1.017582352 | 0.014548439 | up |
| WH.4.023 | 0.669156773 | 1.001460016 | 1 | up |
| WO2009093972 | 0.002322533 | 0.967513194 | 0.320509489 | down |
| WZ.1.84 | 3.75E-07 | 0.968213542 | 5.17E-05 | down |
| X17.AAG | 0.045967341 | 0.8919748 | 1 | down |
| X681640 | 6.29E-07 | 0.933717596 | 8.68E-05 | down |
| XMD8.85 | 0.000285519 | 1.040757953 | 0.039401576 | up |
| Z.LLNle.CHO | 0.002990298 | 0.893392796 | 0.412661162 | down |
| ZM.447439 | 0.261914663 | 1.013483745 | 1 | up |
